# Supplementary material for: A highly efficient one-pot reaction of 2-(gem-dibromovinyl)phenols(thiophenols) with K4Fe(CN)6 to 2-cyanobenzofurans(thiophenes)
Source: Royal Society of Chemistry journal article supplement (doi:10.1039/c2ob25356a), 2012-01-01
Supplement: c2ob25356a.pdf [file c2ob25356a.pdf]

Supplementary Material (ESI) for Organic & Biomolecular Chemistry

This journal is (c) The Royal Society of Chemistry 2012

**A Highly Efficient One-Pot Reaction of 2-(*gem*-  
Dibromovinyl)phenols(thiophenols) with  $K_4Fe(CN)_6$  to 2-  
Cyanobenzofurans(thiophenes)**

Wei Zhou,<sup>†</sup> Wei Chen,<sup>†</sup> and Lei Wang<sup>\*†‡</sup>

<sup>†</sup> *Department of Chemistry, Huaibei Normal University, Huaibei, Anhui 235000, P. R. China*

<sup>‡</sup> *State Key Laboratory of Organometallic Chemistry, Shanghai Institute of Organic Chemistry*

*Shanghai 200032, P. R. China*

*leiwang@chnu.edu.cn*

***Table of Contents for Supporting Information***

|                                                                              |   |
|------------------------------------------------------------------------------|---|
| 1. D-Labelled spectra of substrates and products.....                        | 2 |
| 2. <sup>1</sup> H, <sup>13</sup> C NMR and HRMS spectra of the products..... | 4 |

## 1. D-Labelled spectra of substrate and product

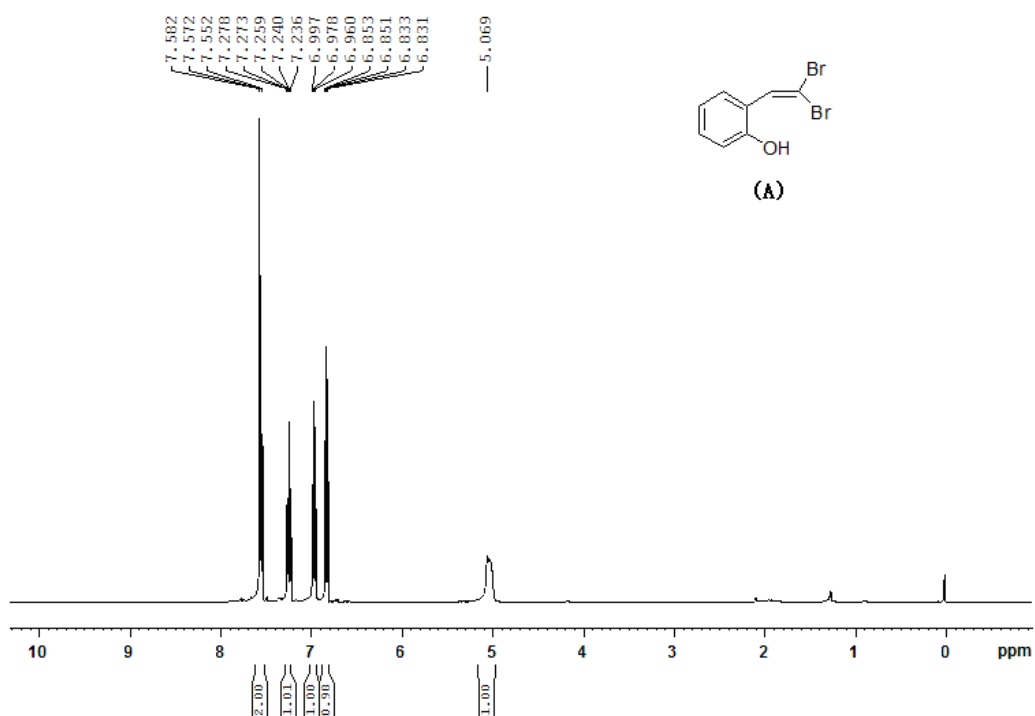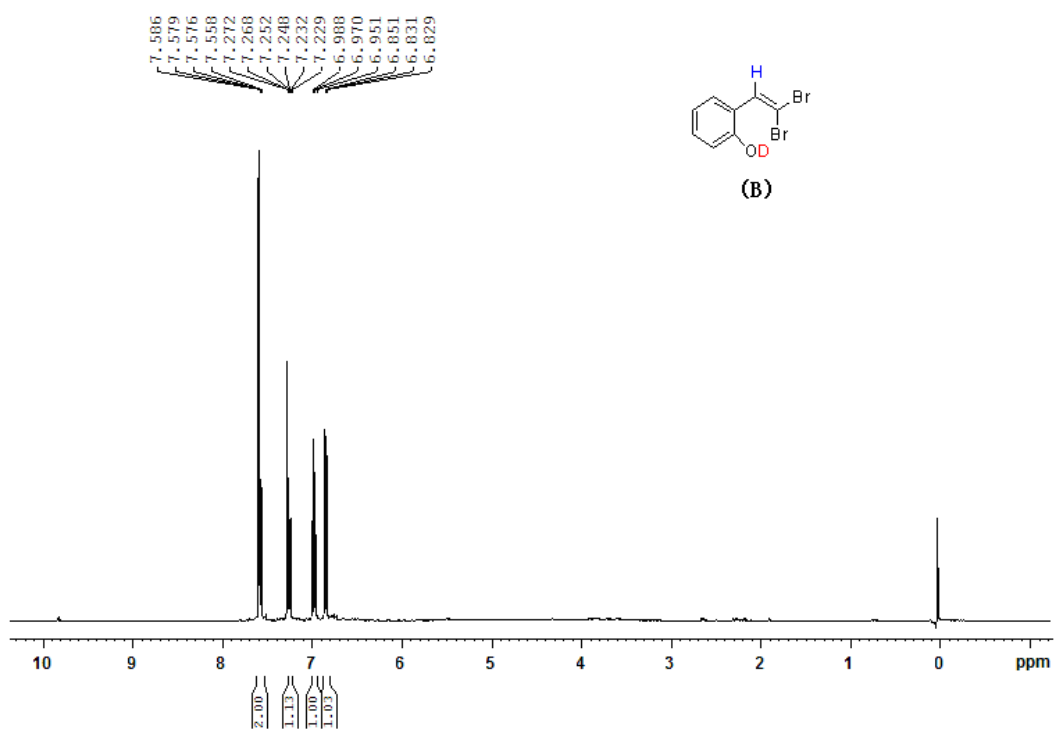

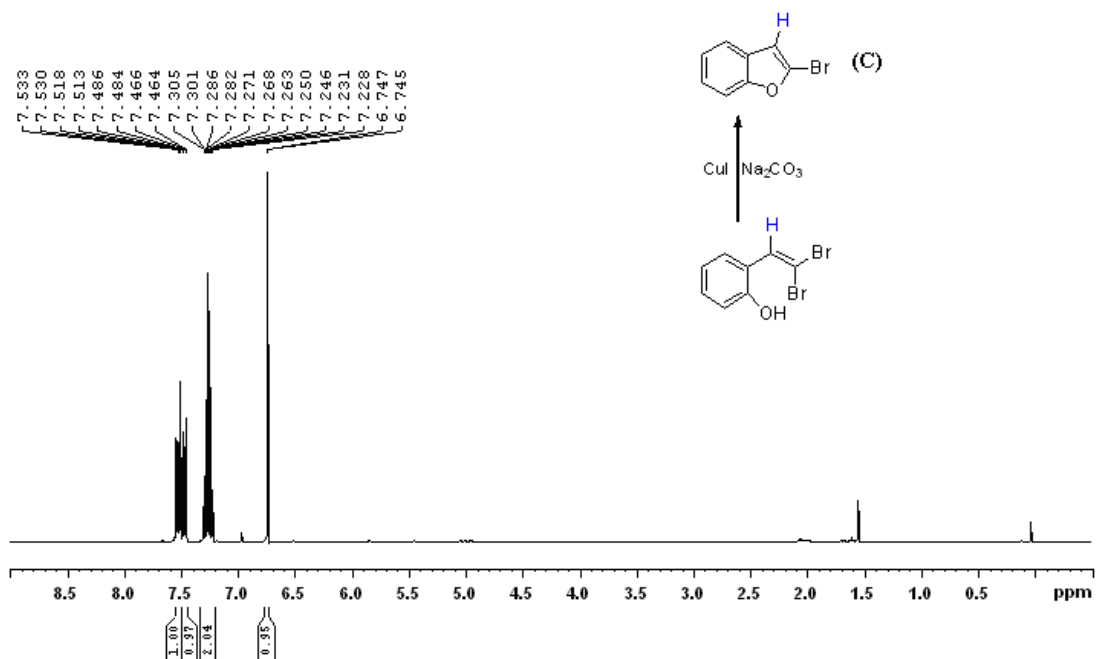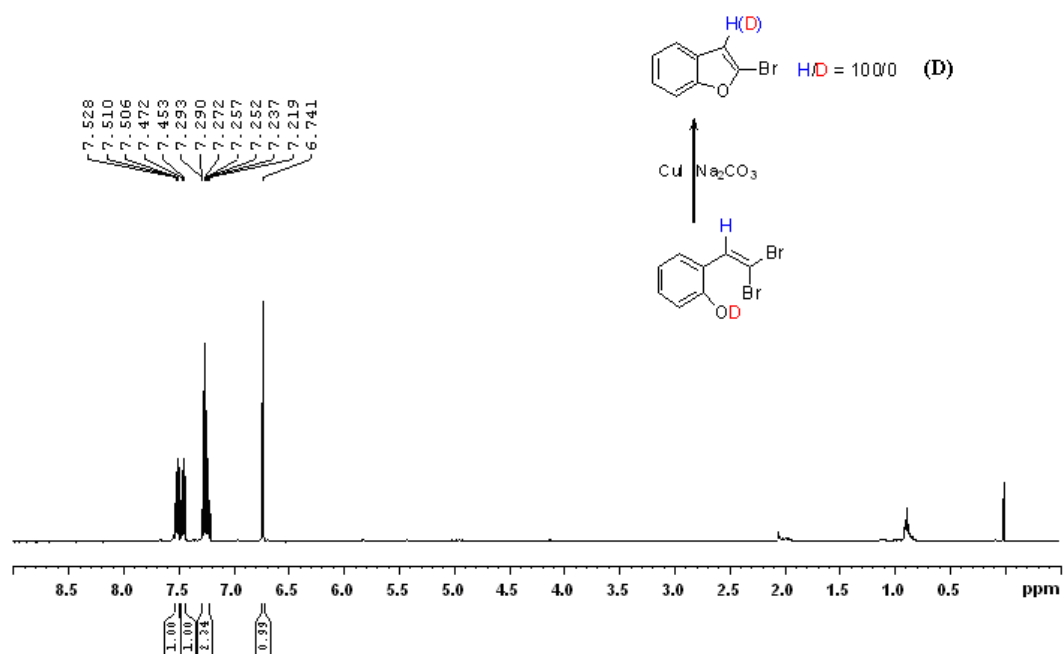

## 2. $^1\text{H}$ , $^{13}\text{C}$ NMR and HRMS spectra of the products

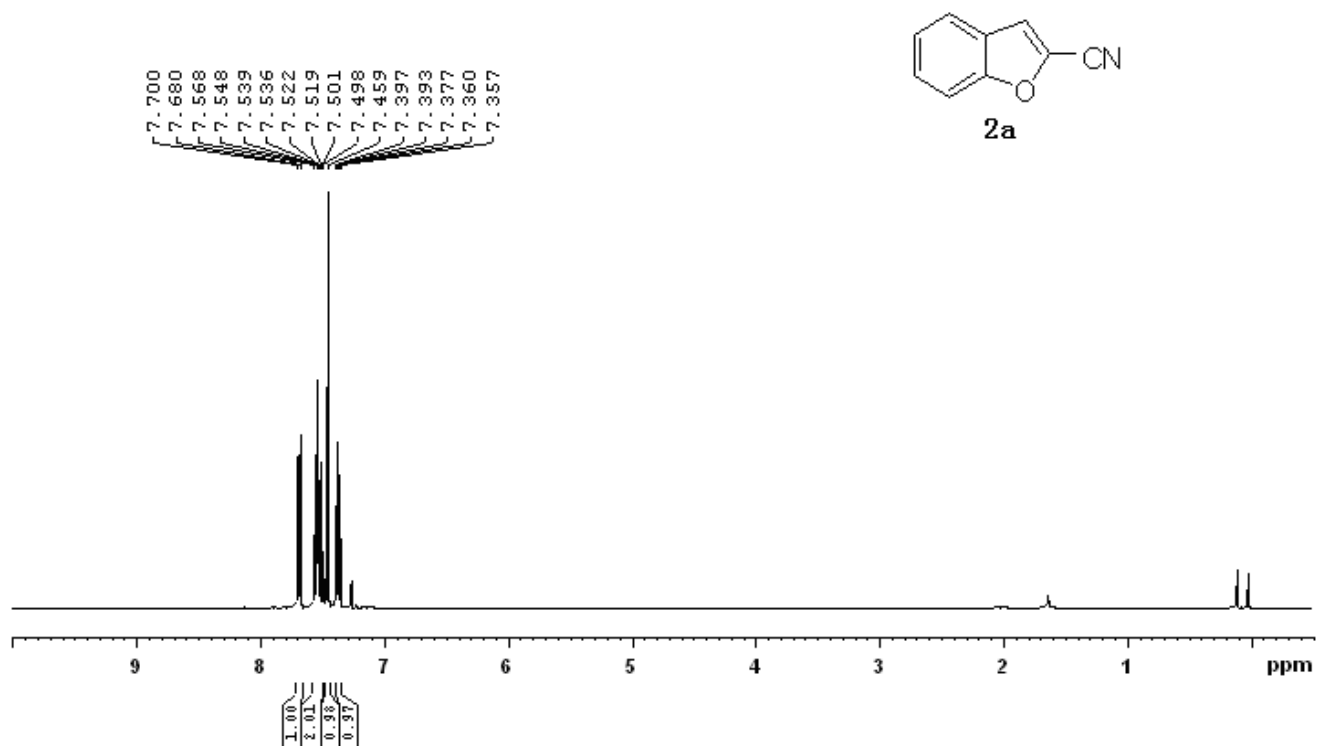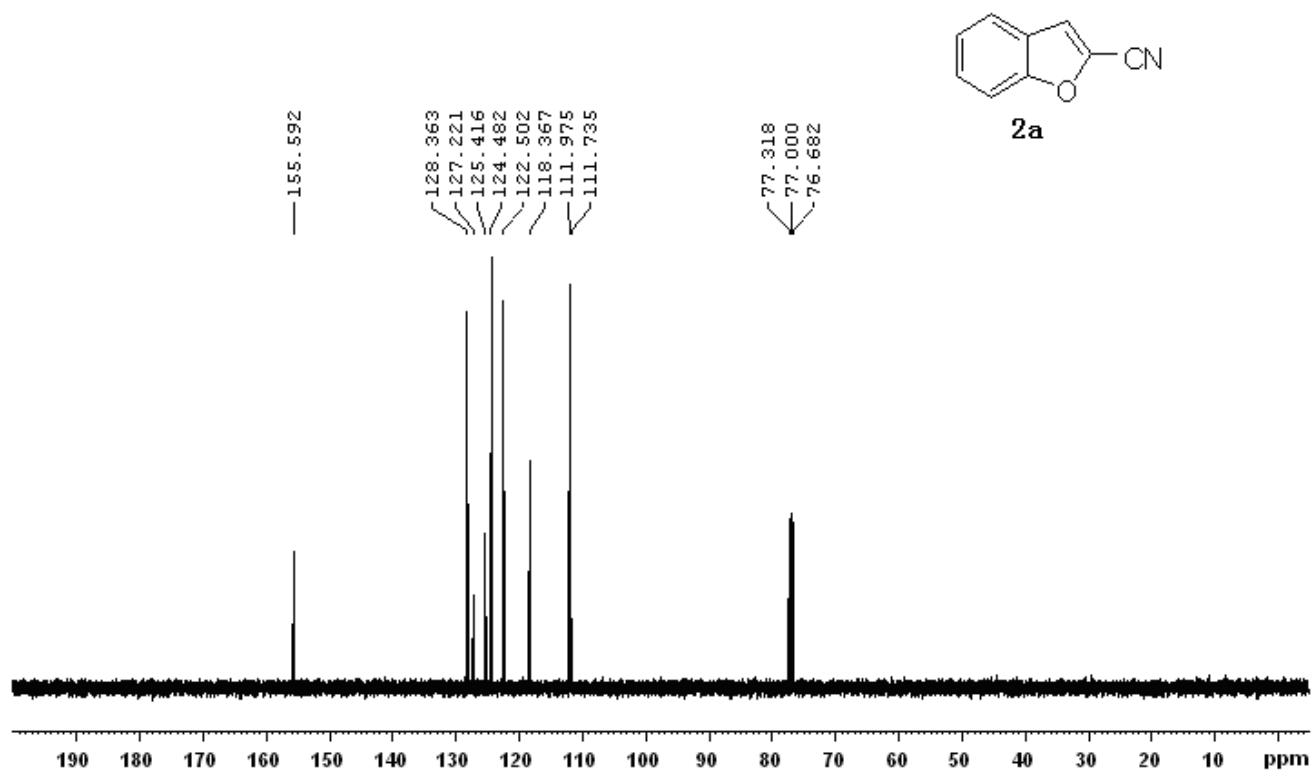

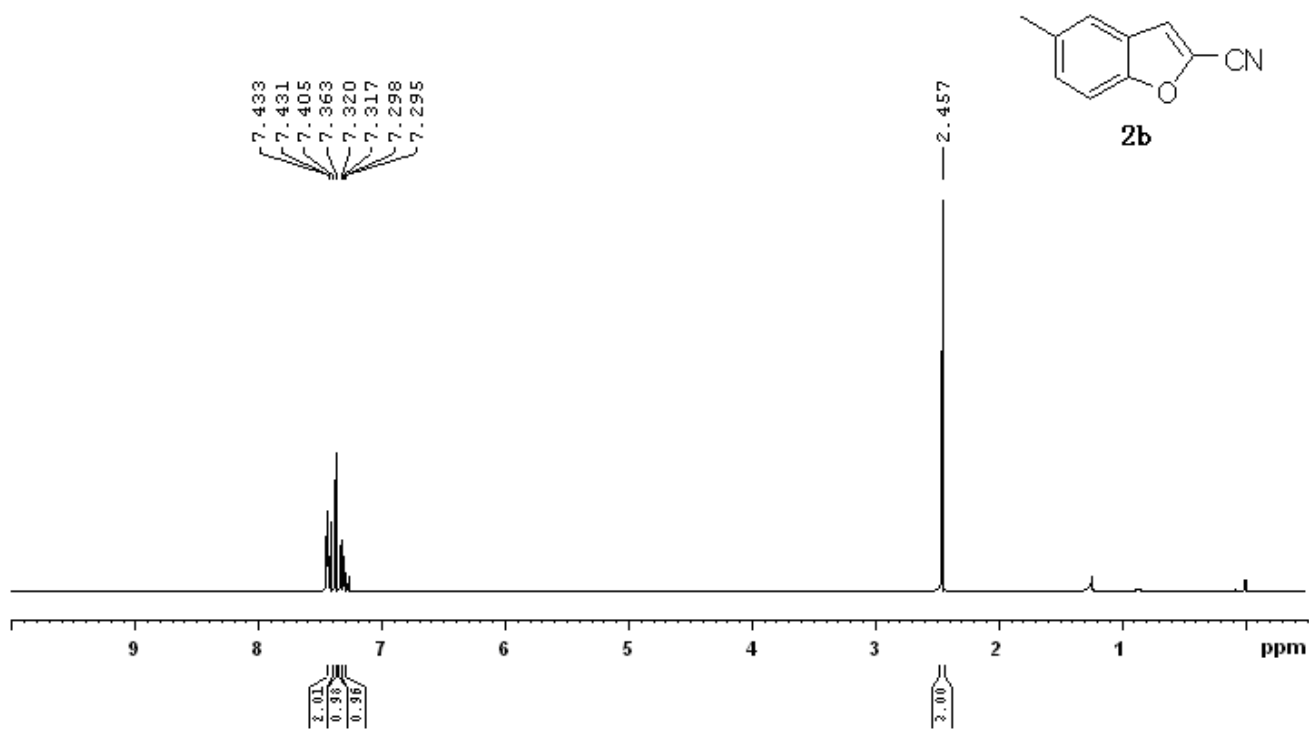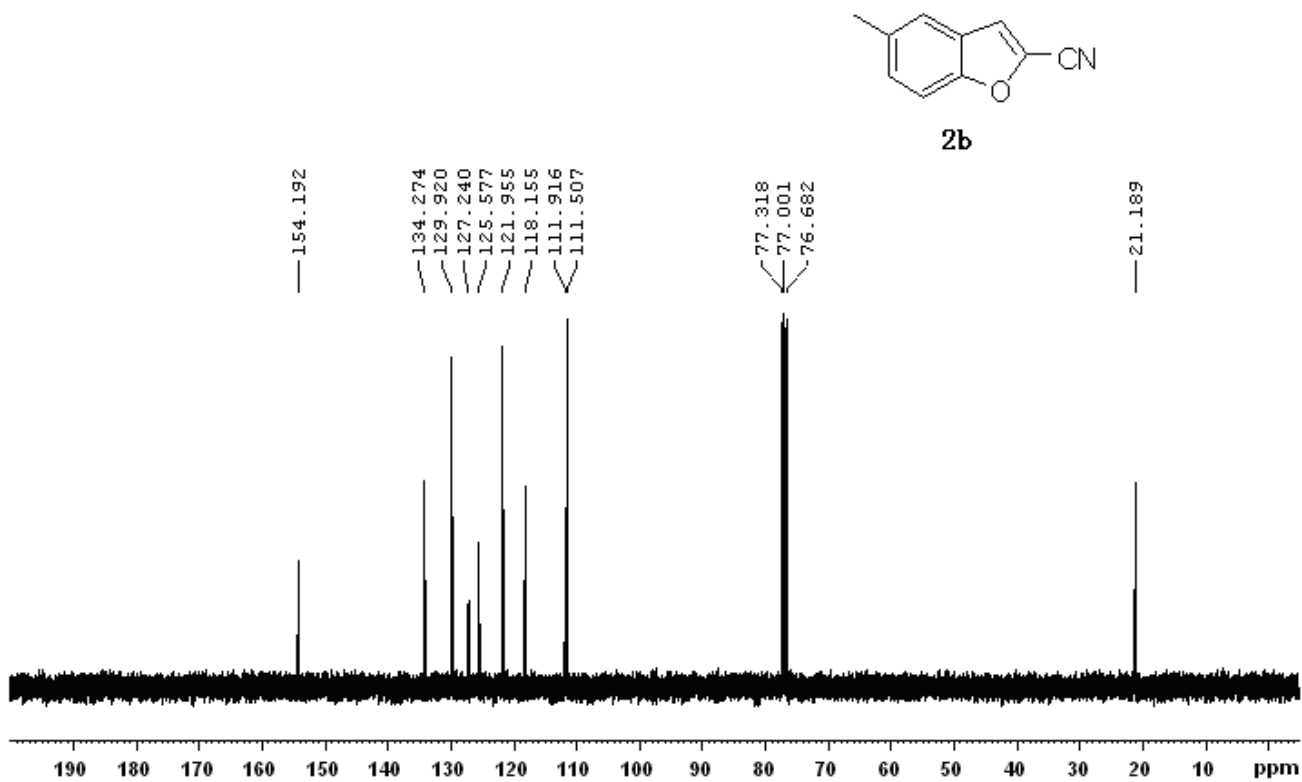

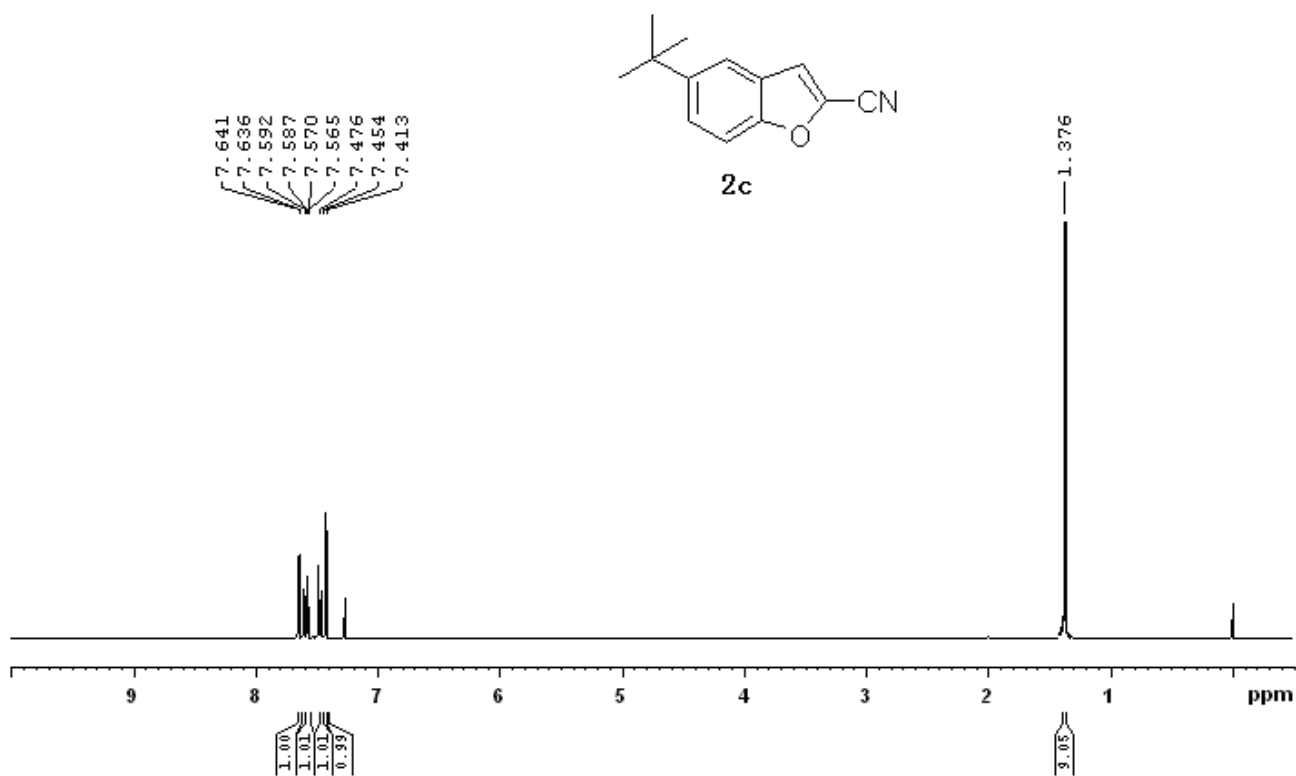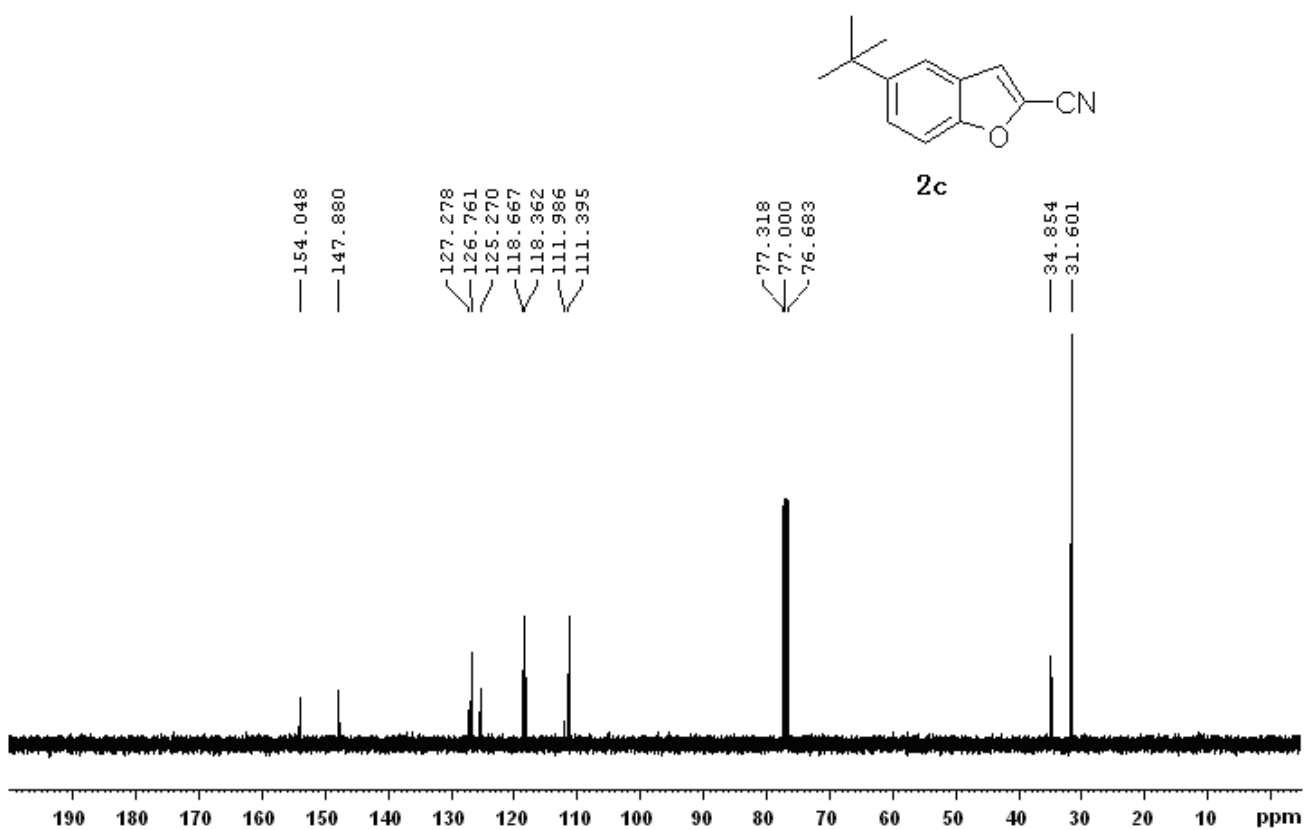

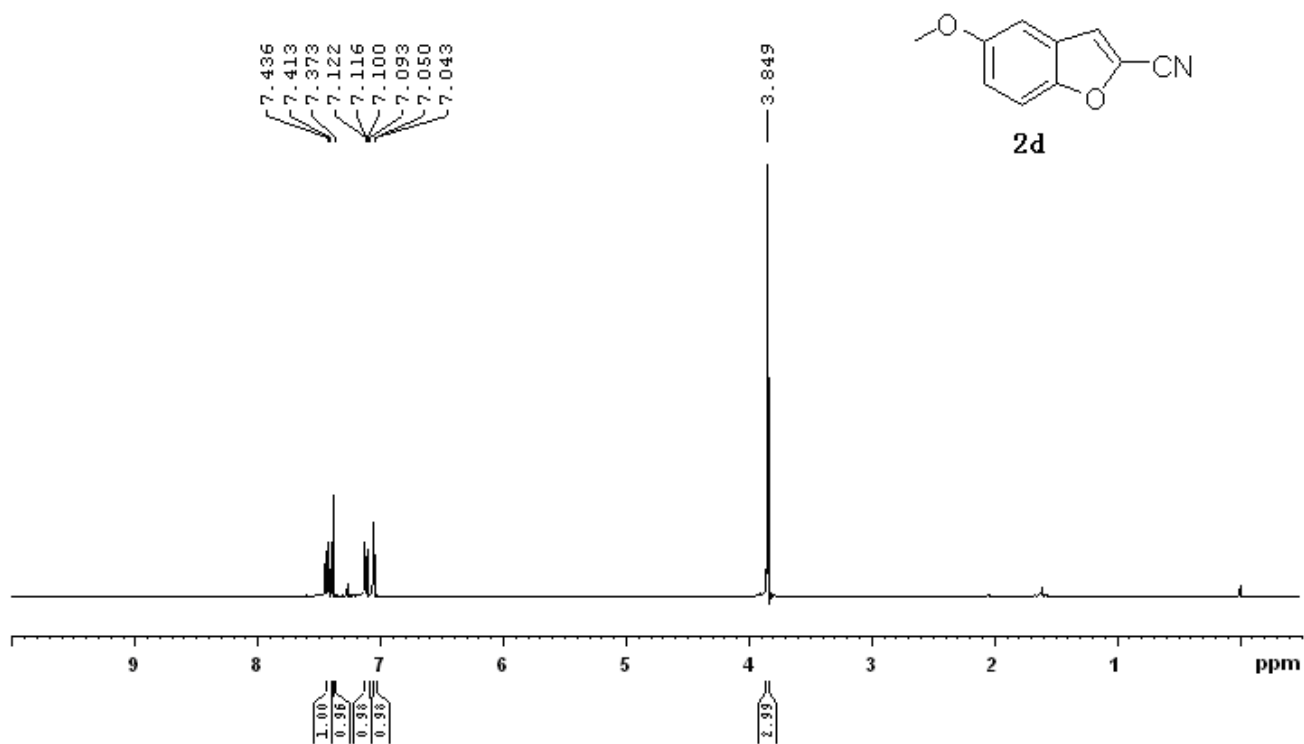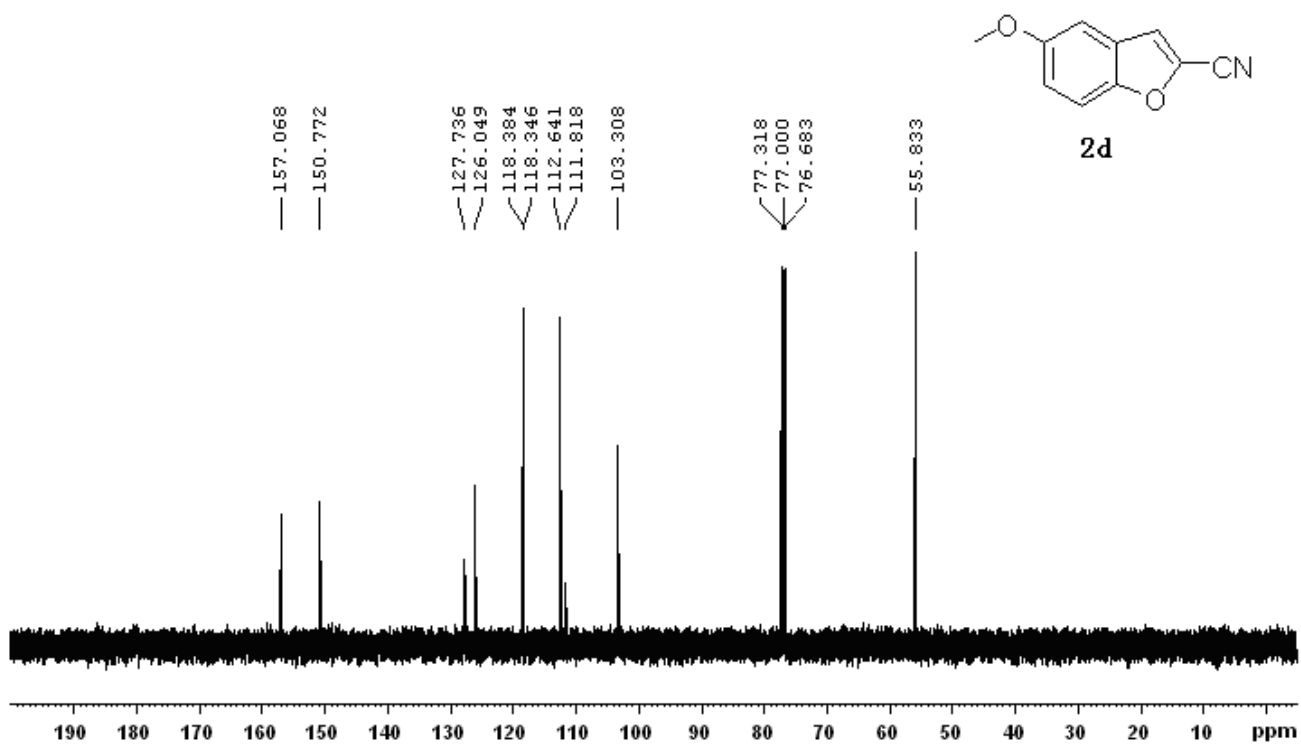

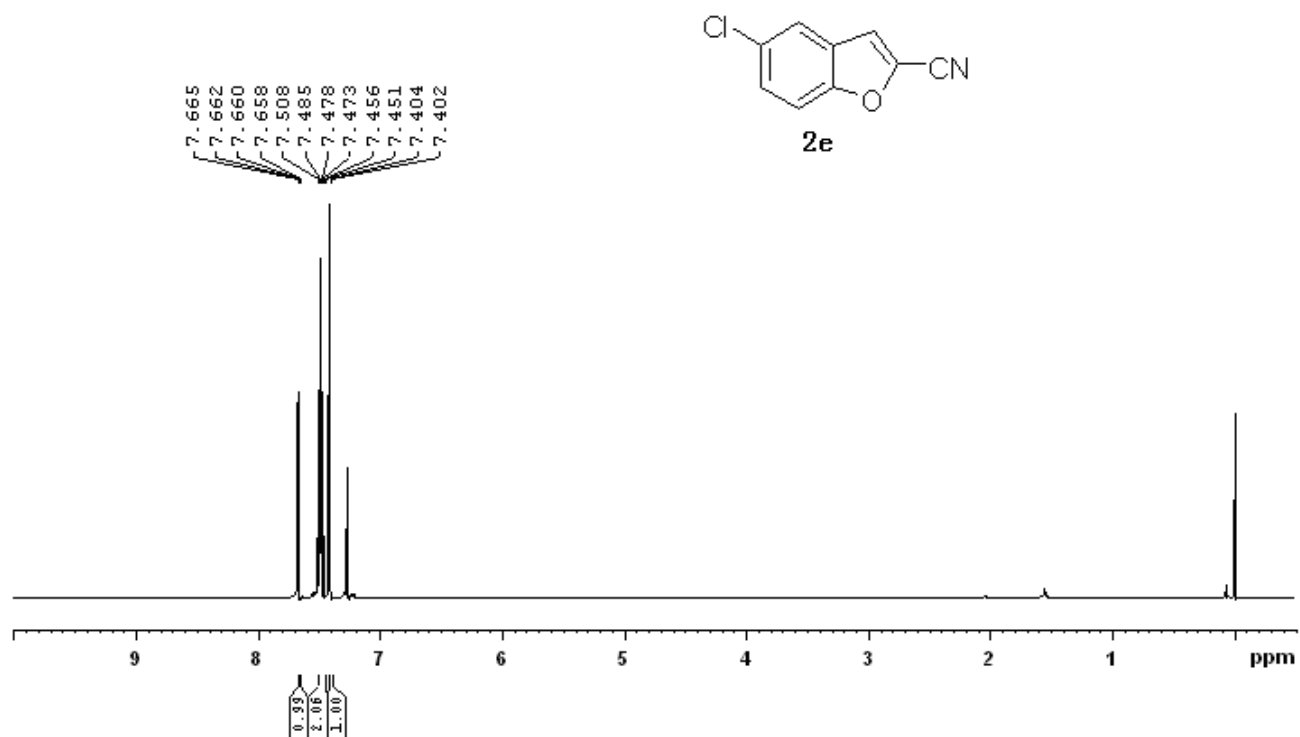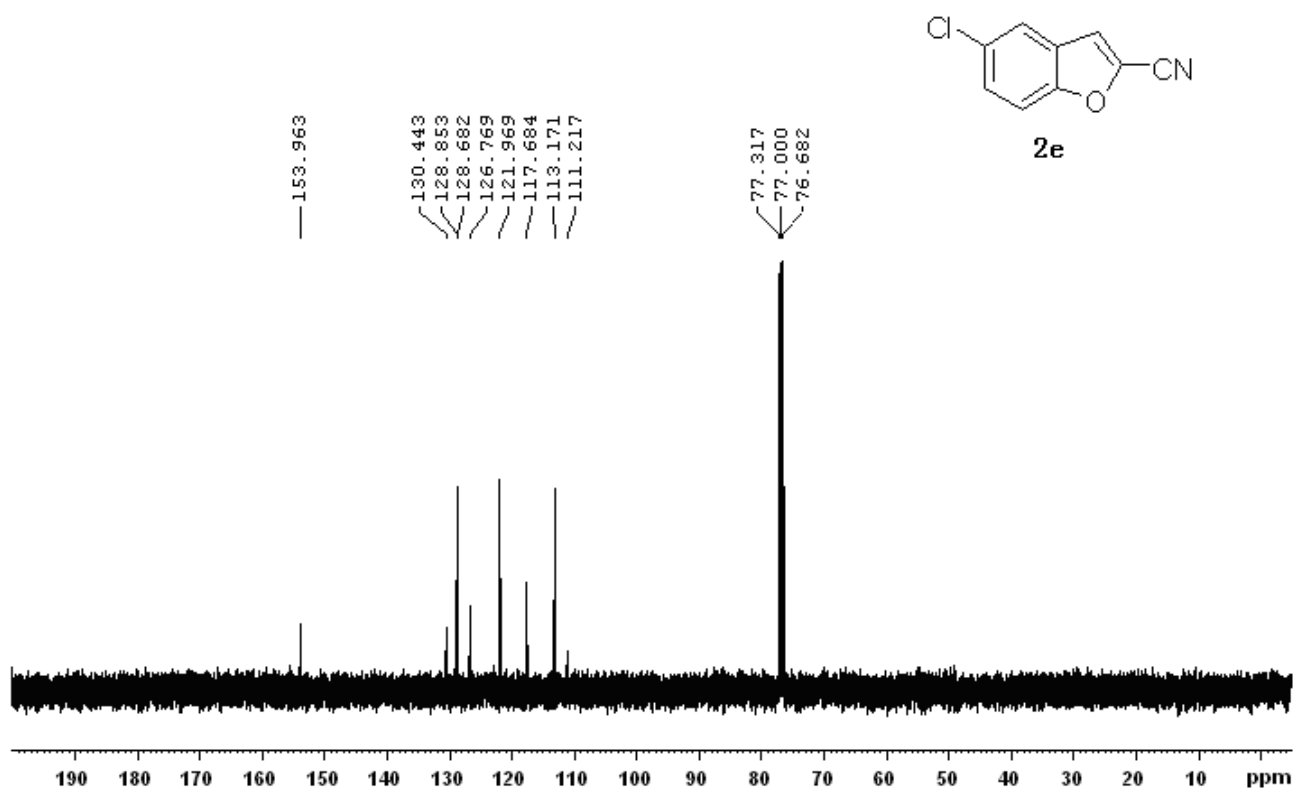



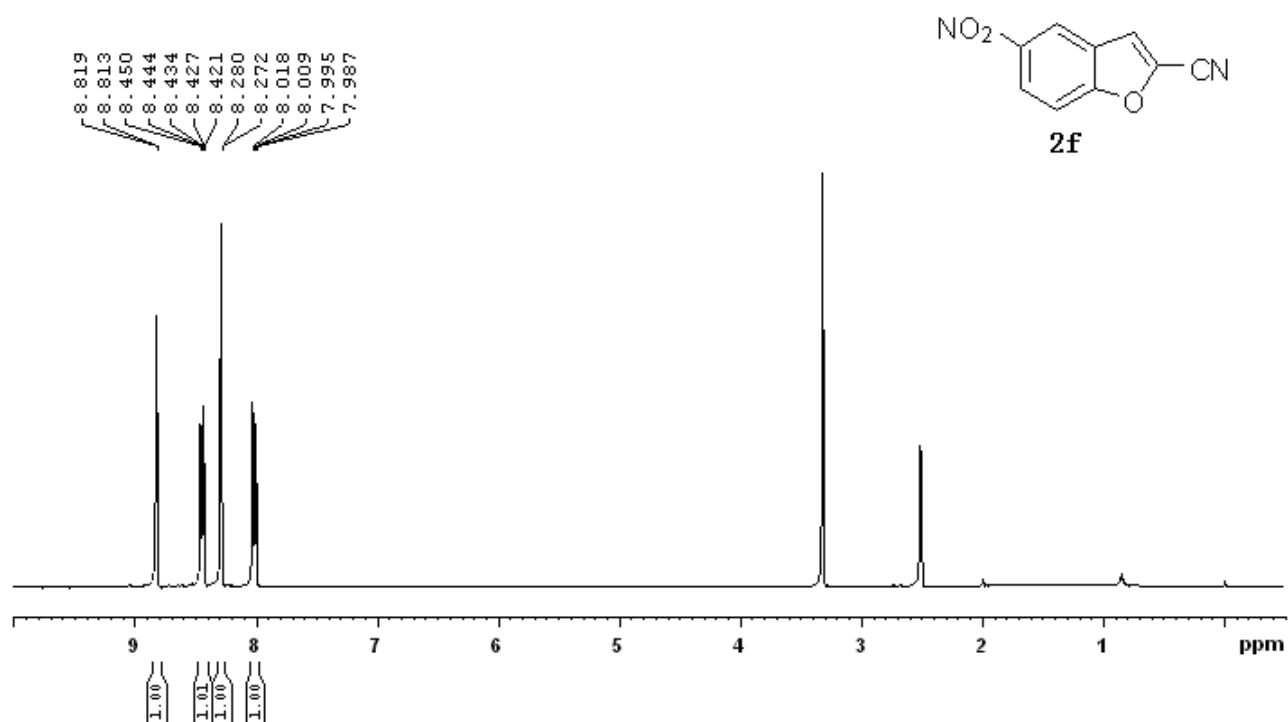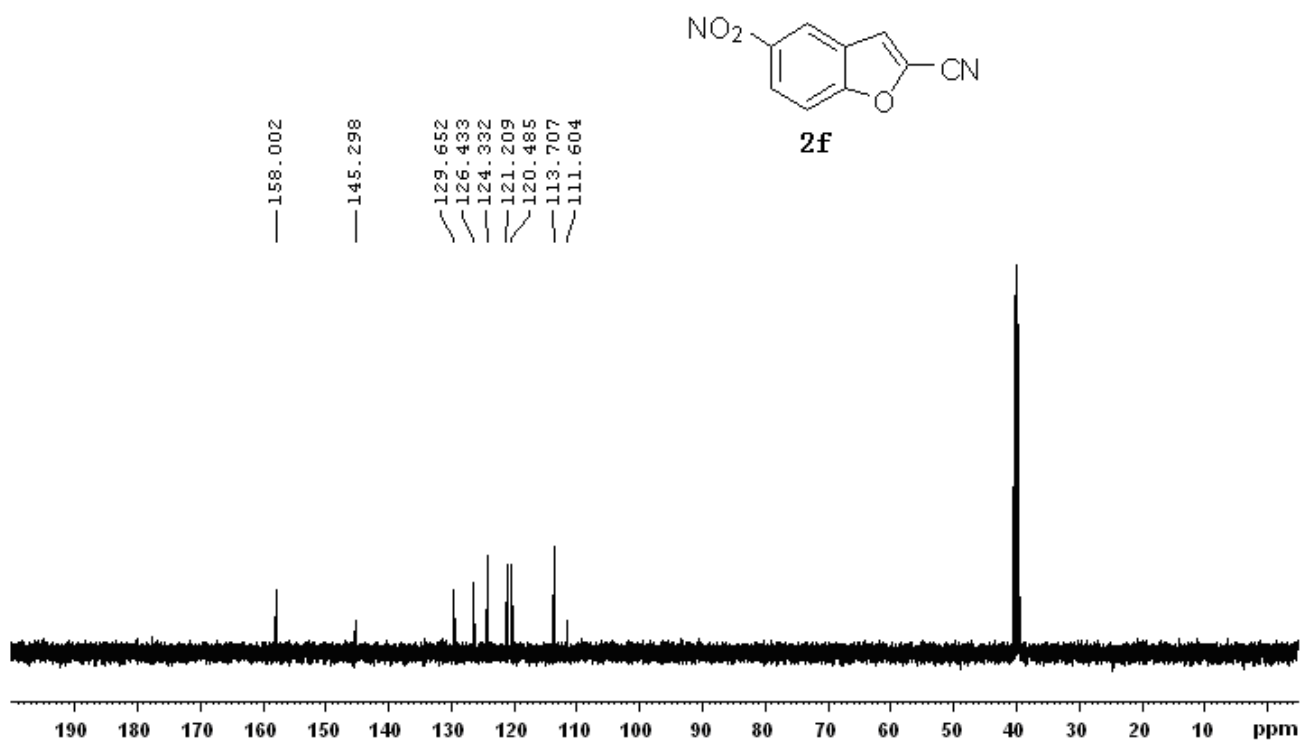

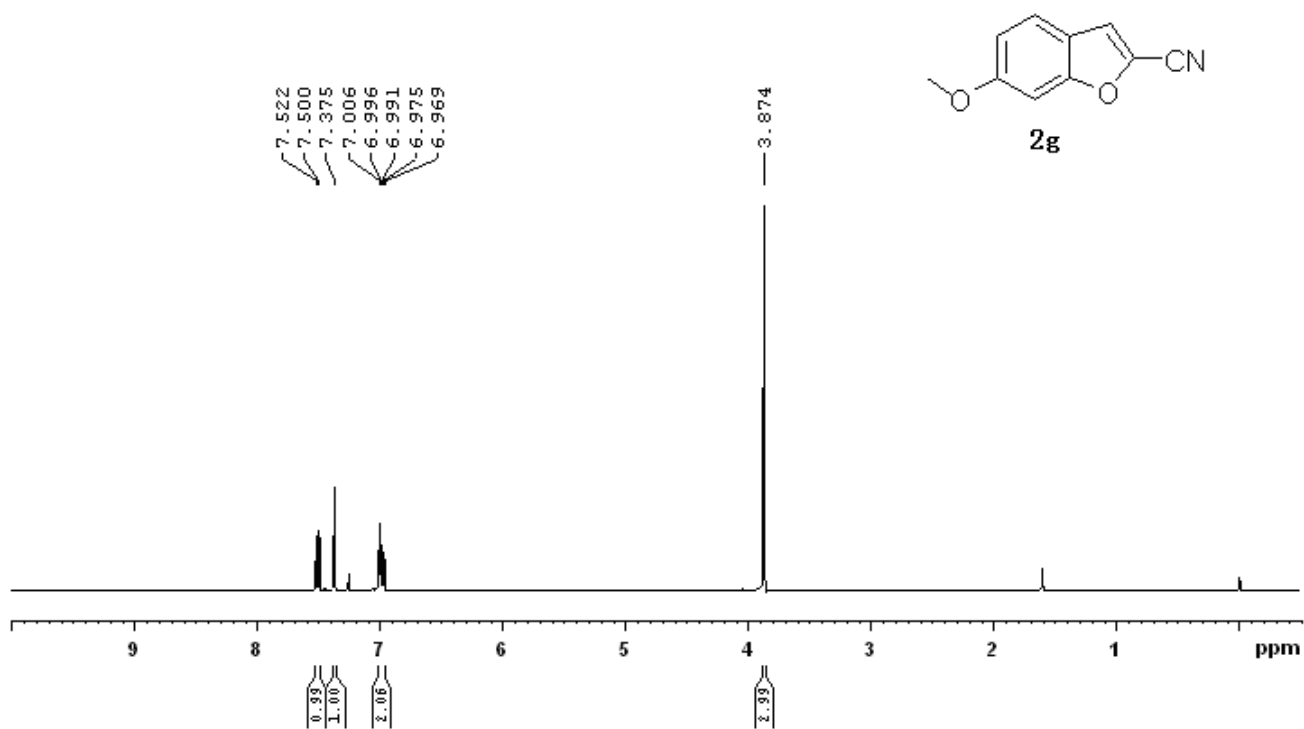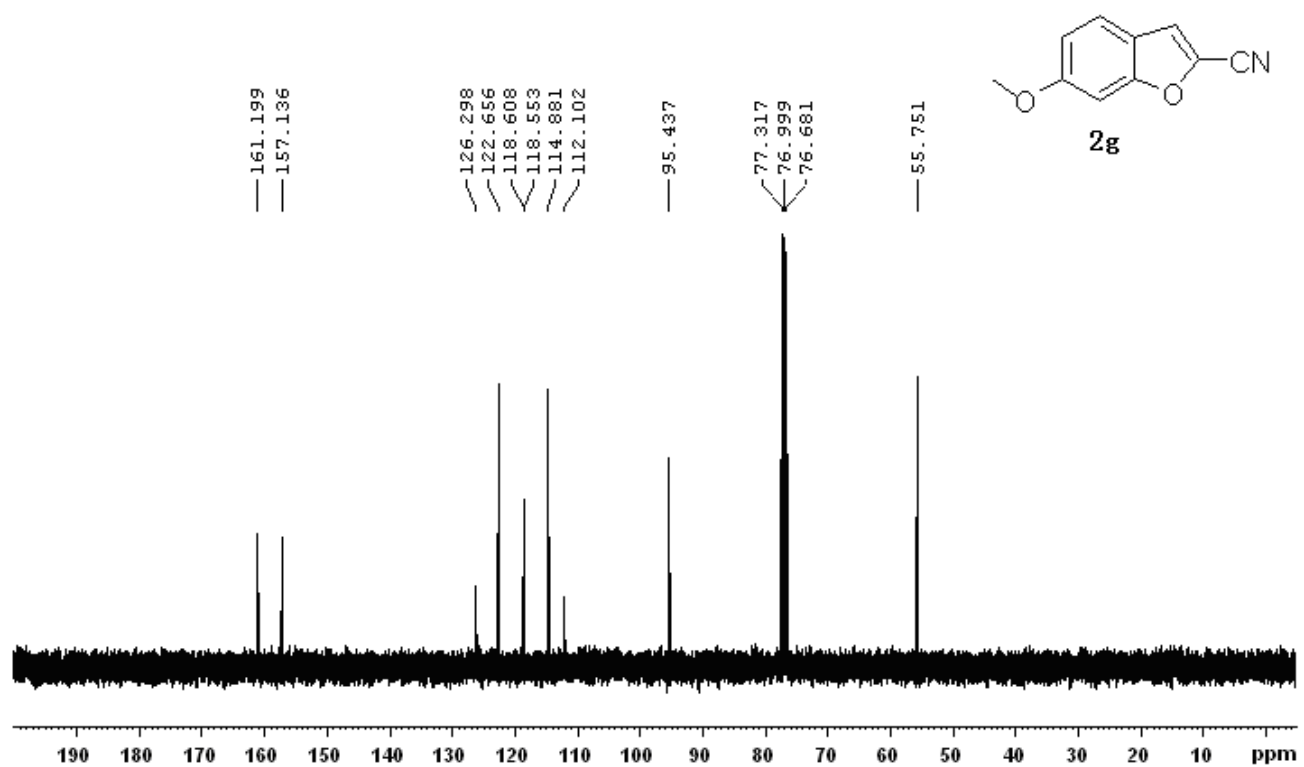

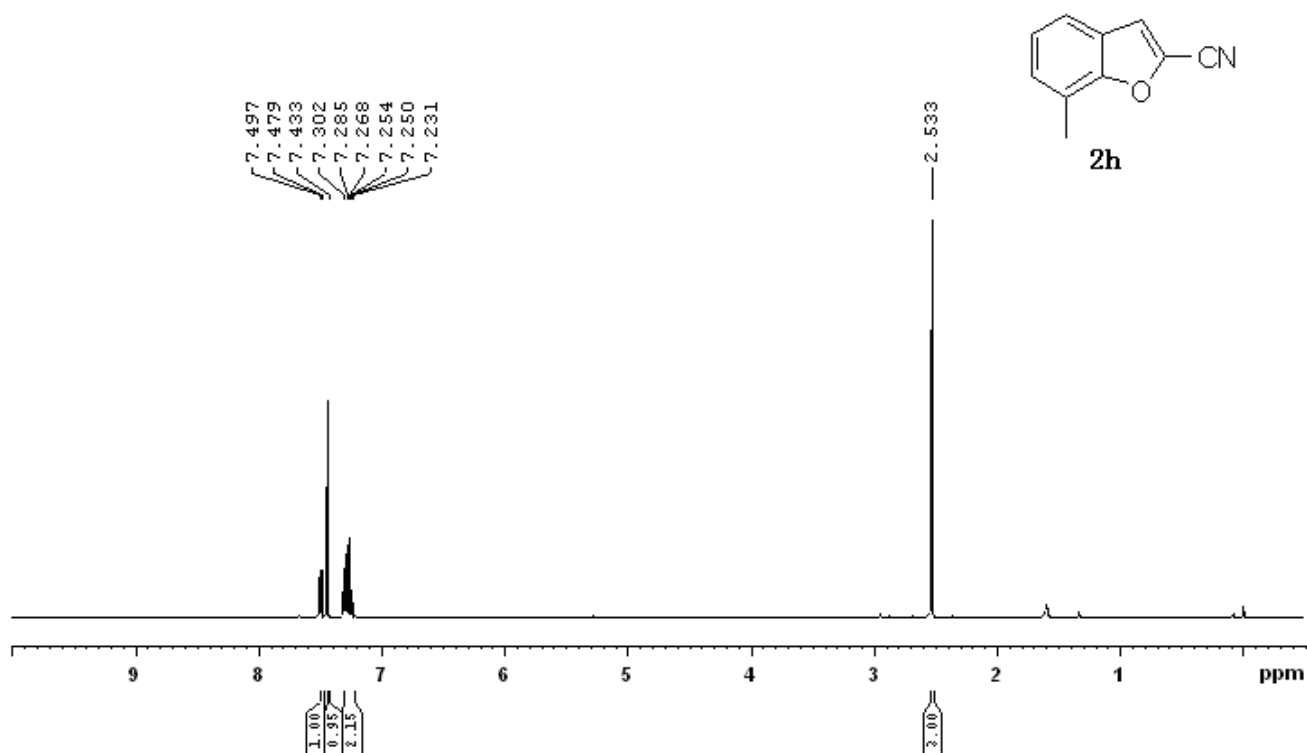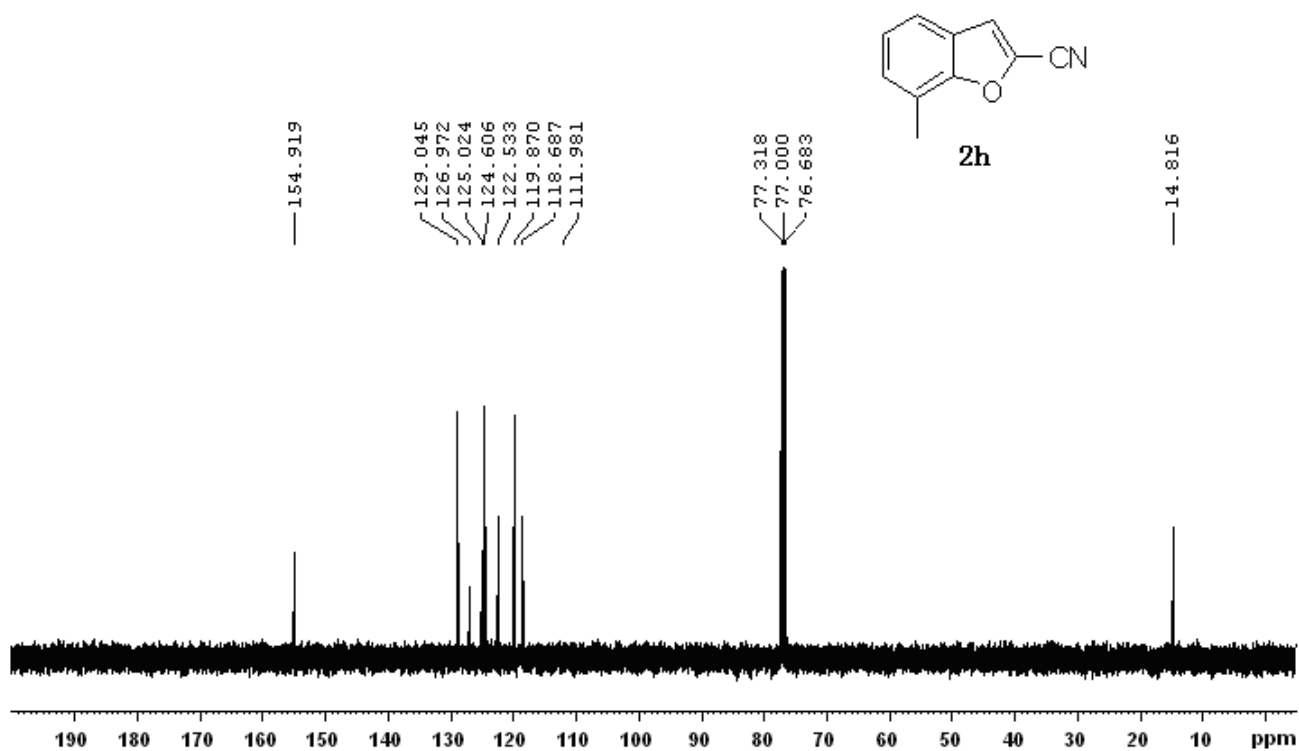

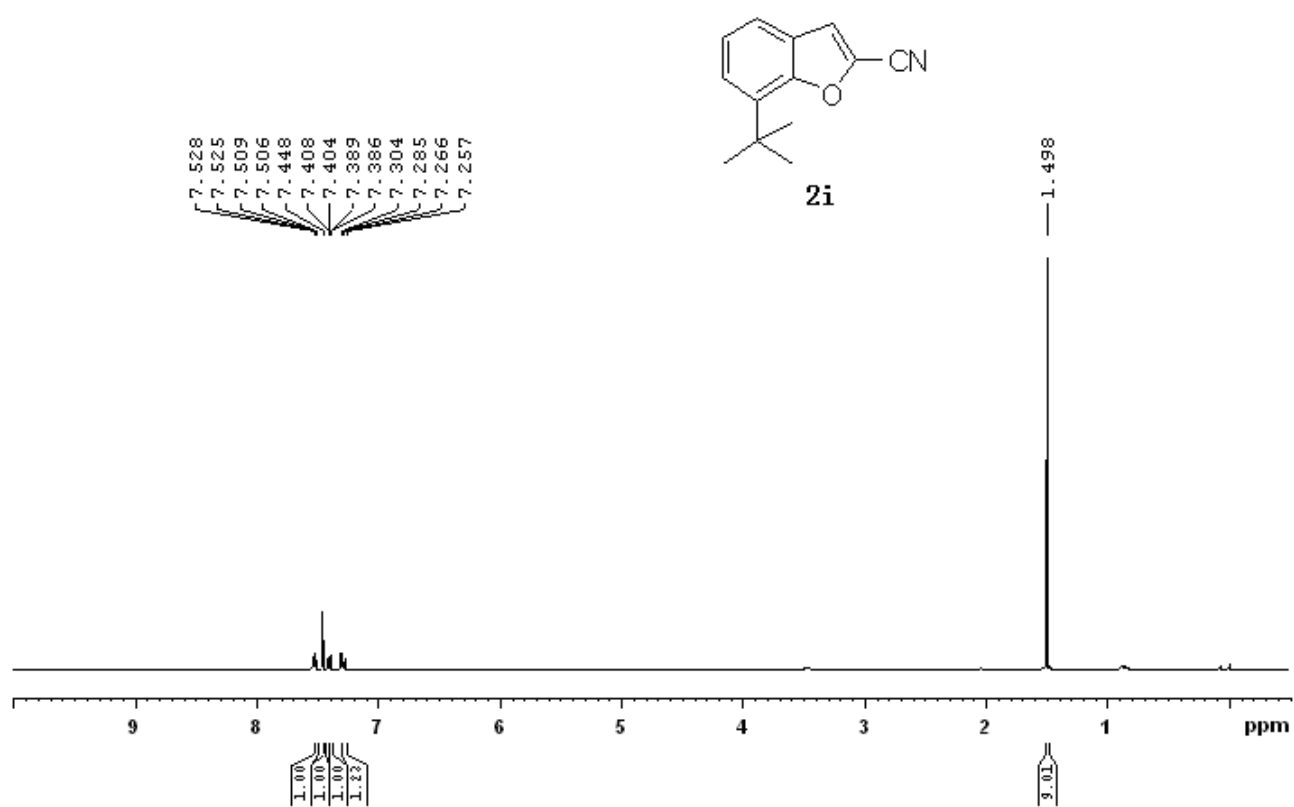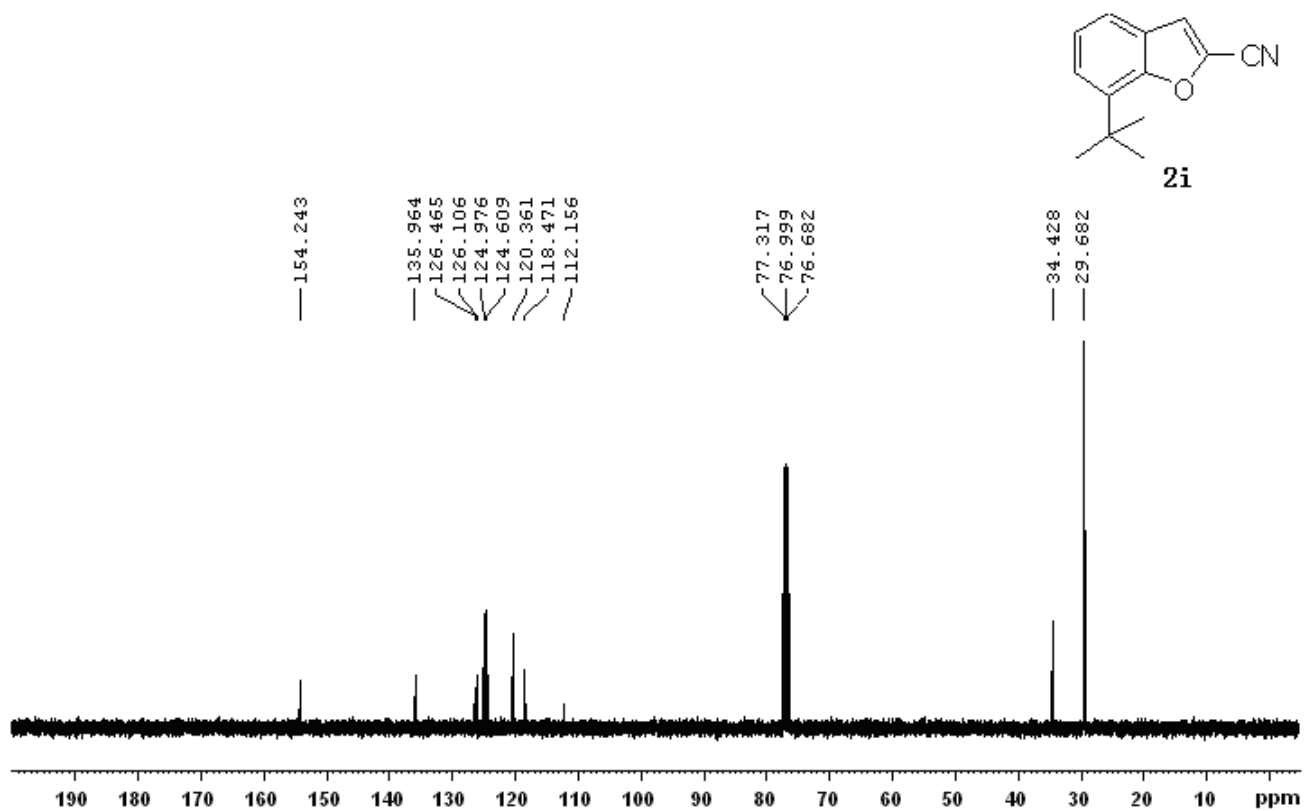

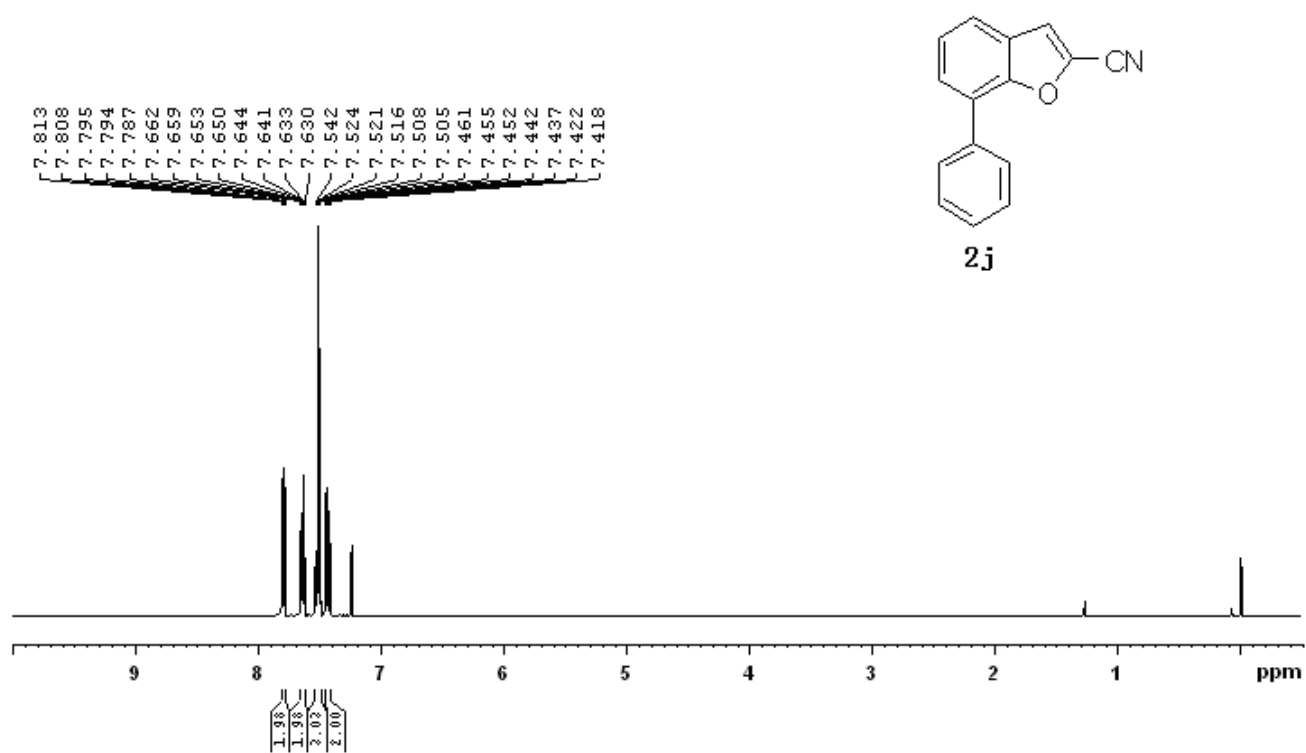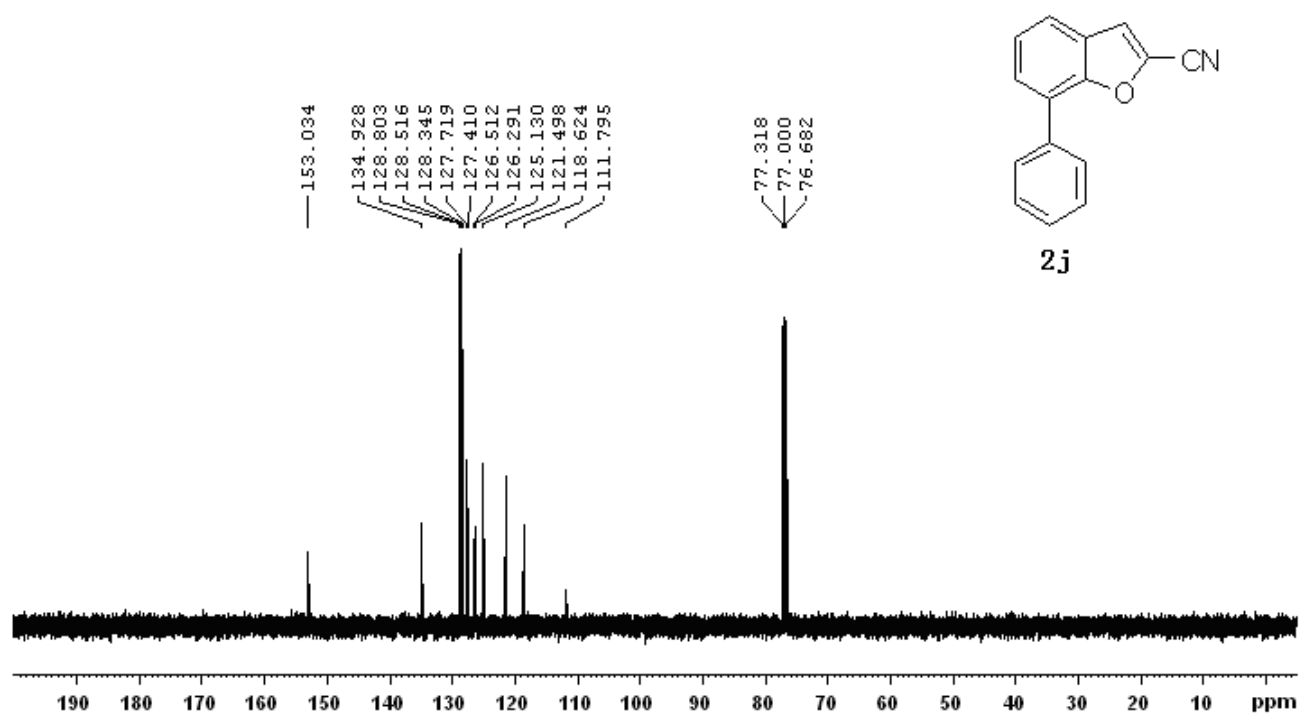

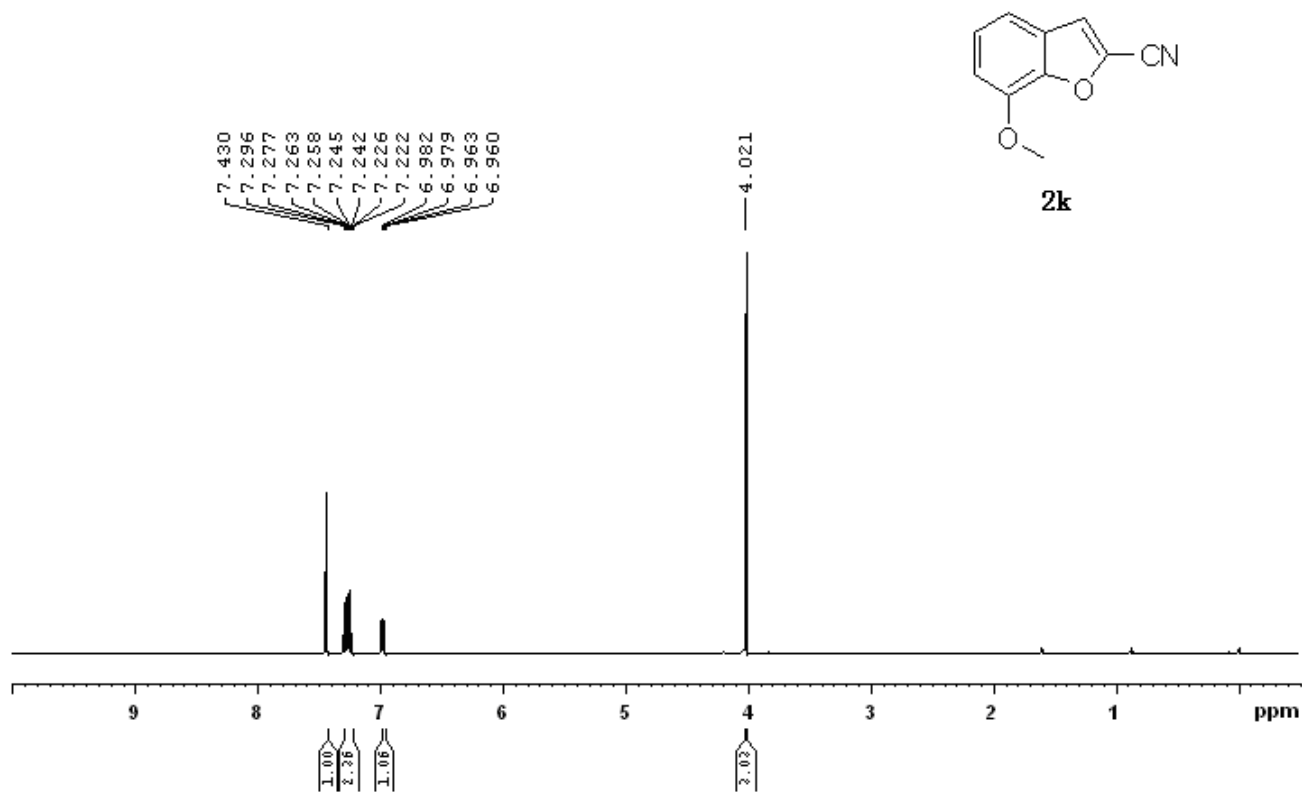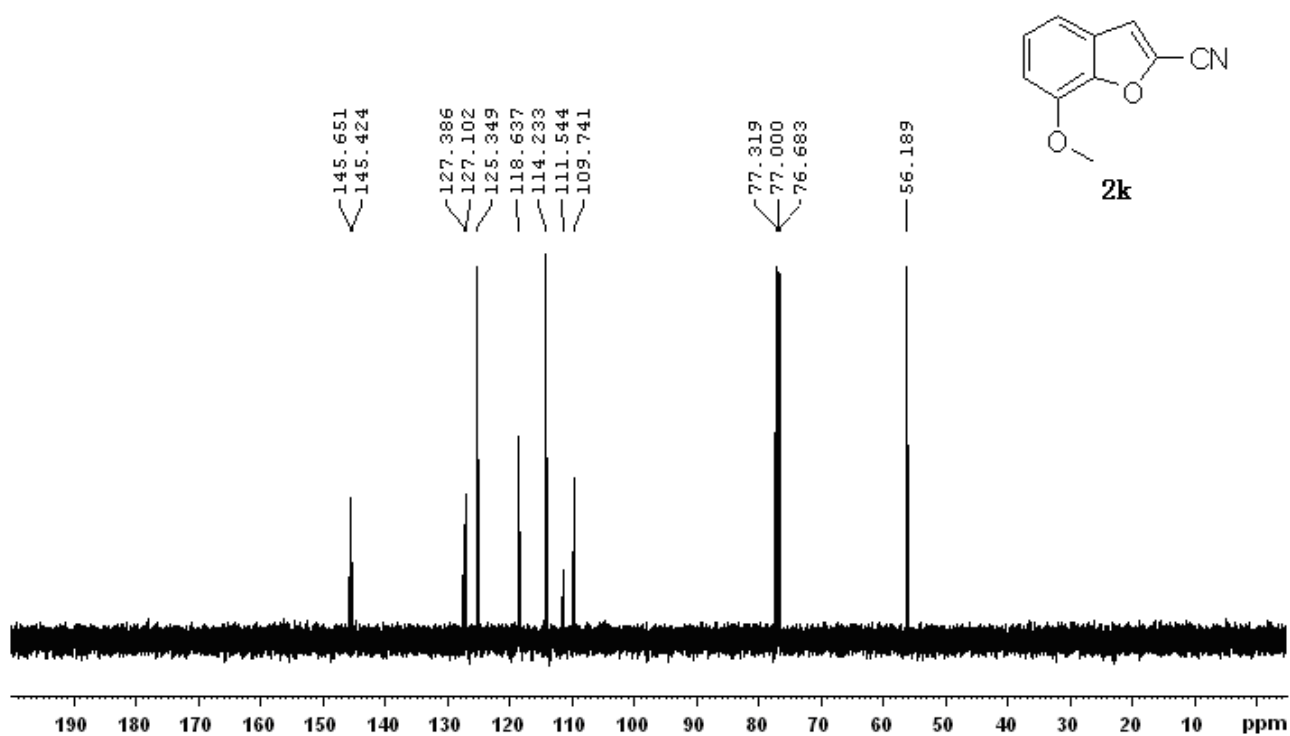

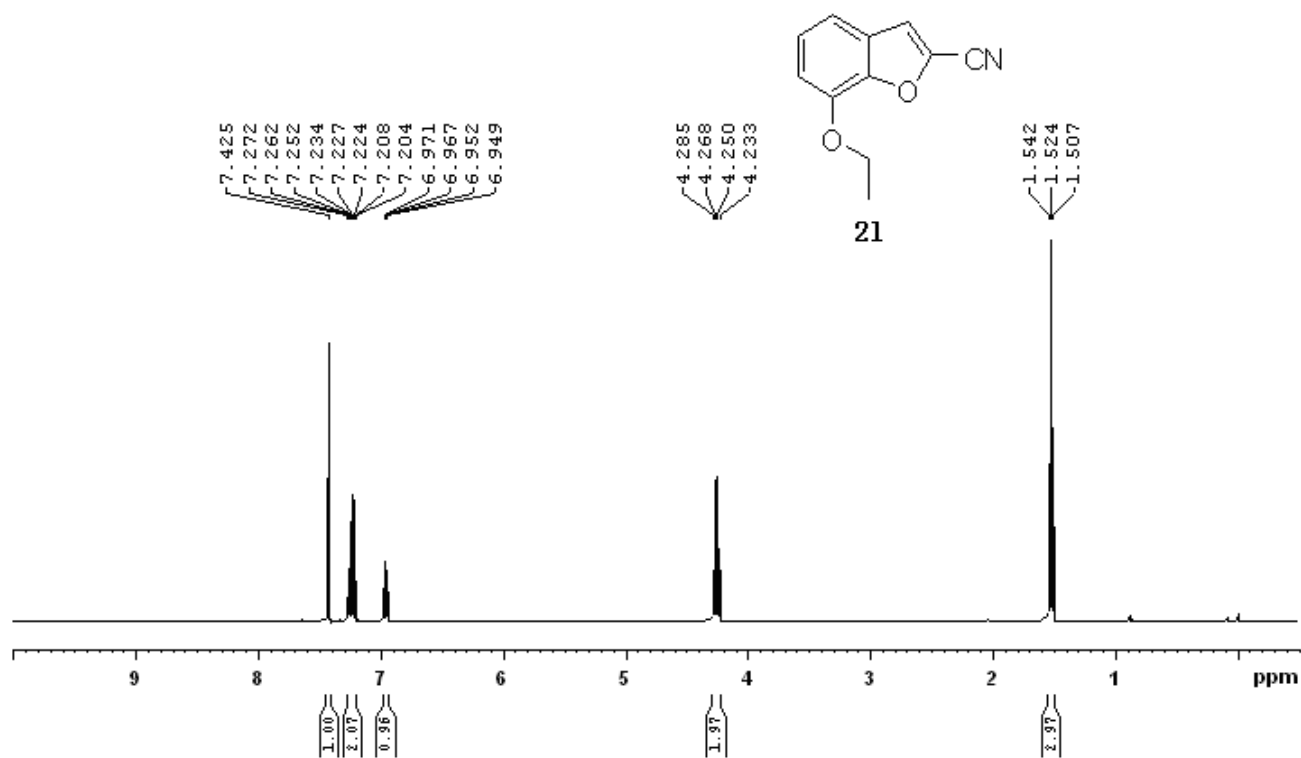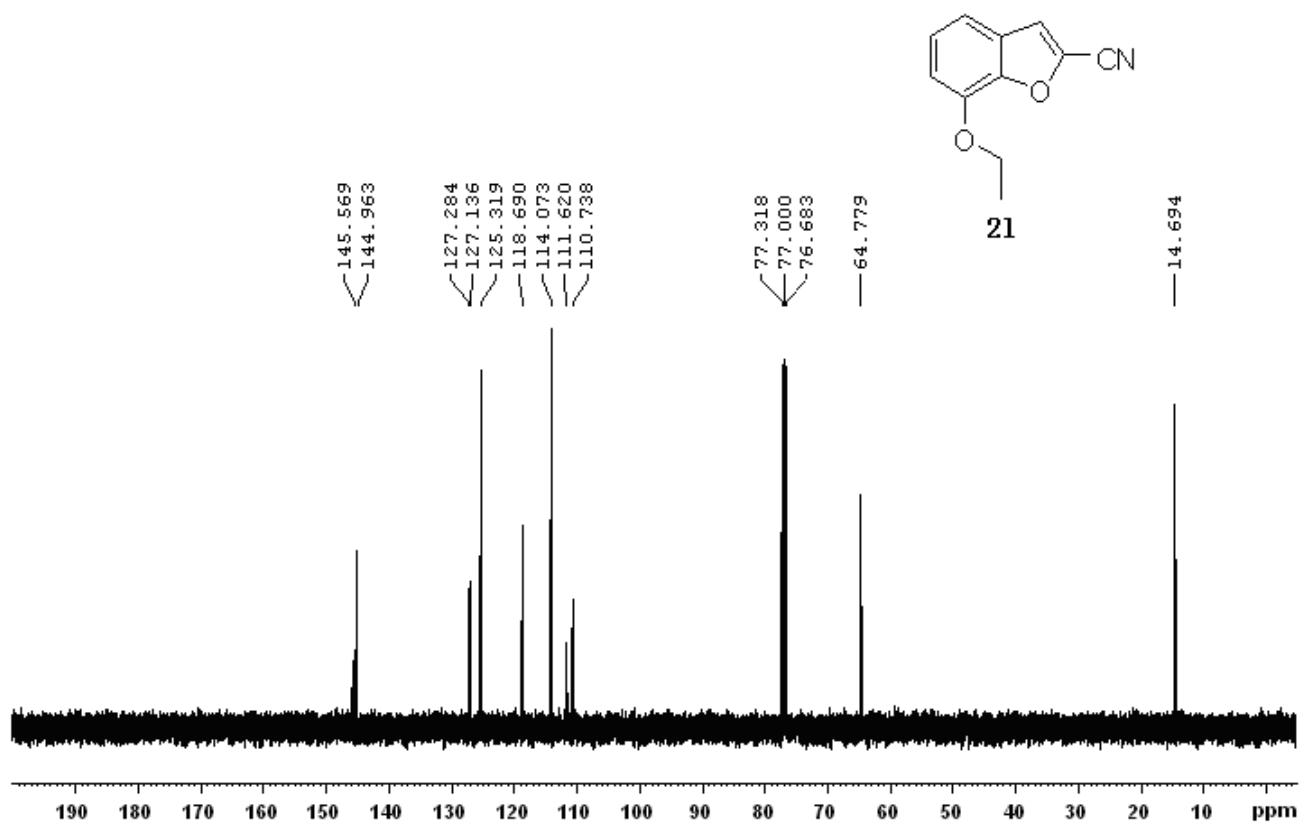

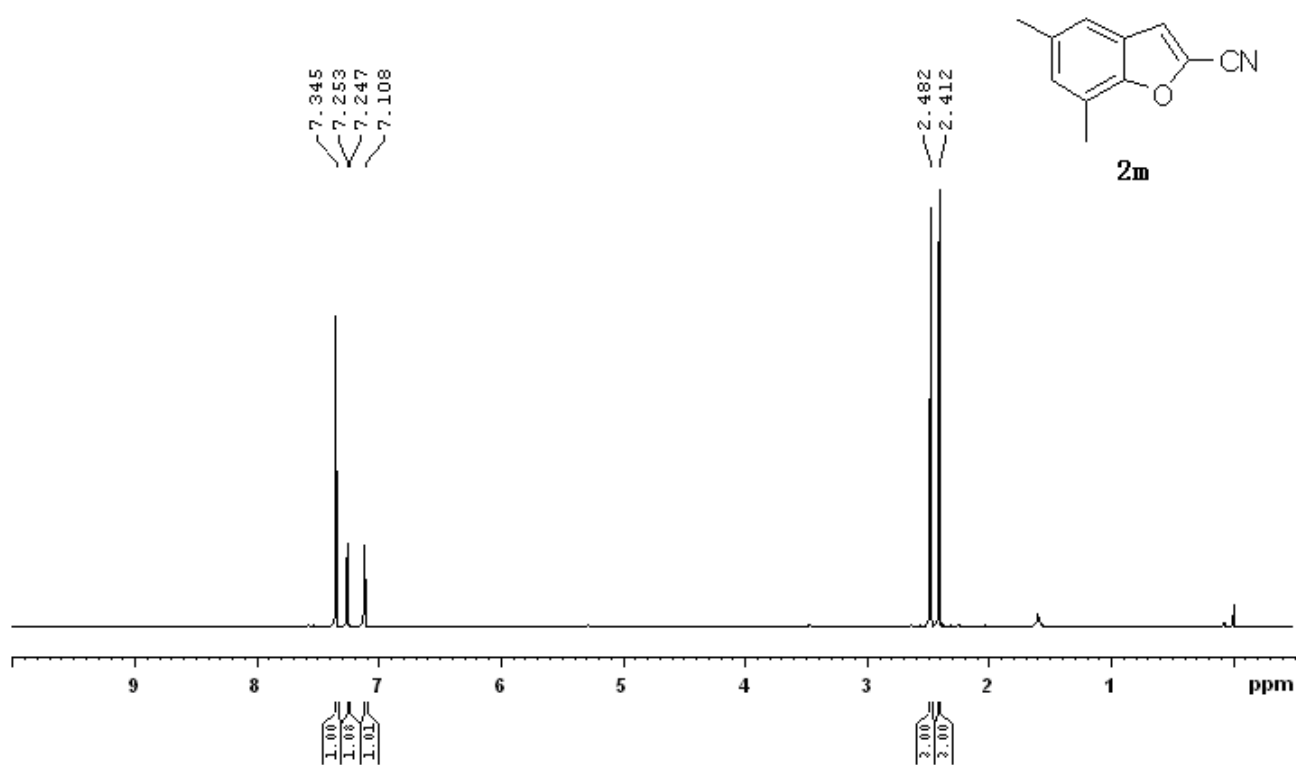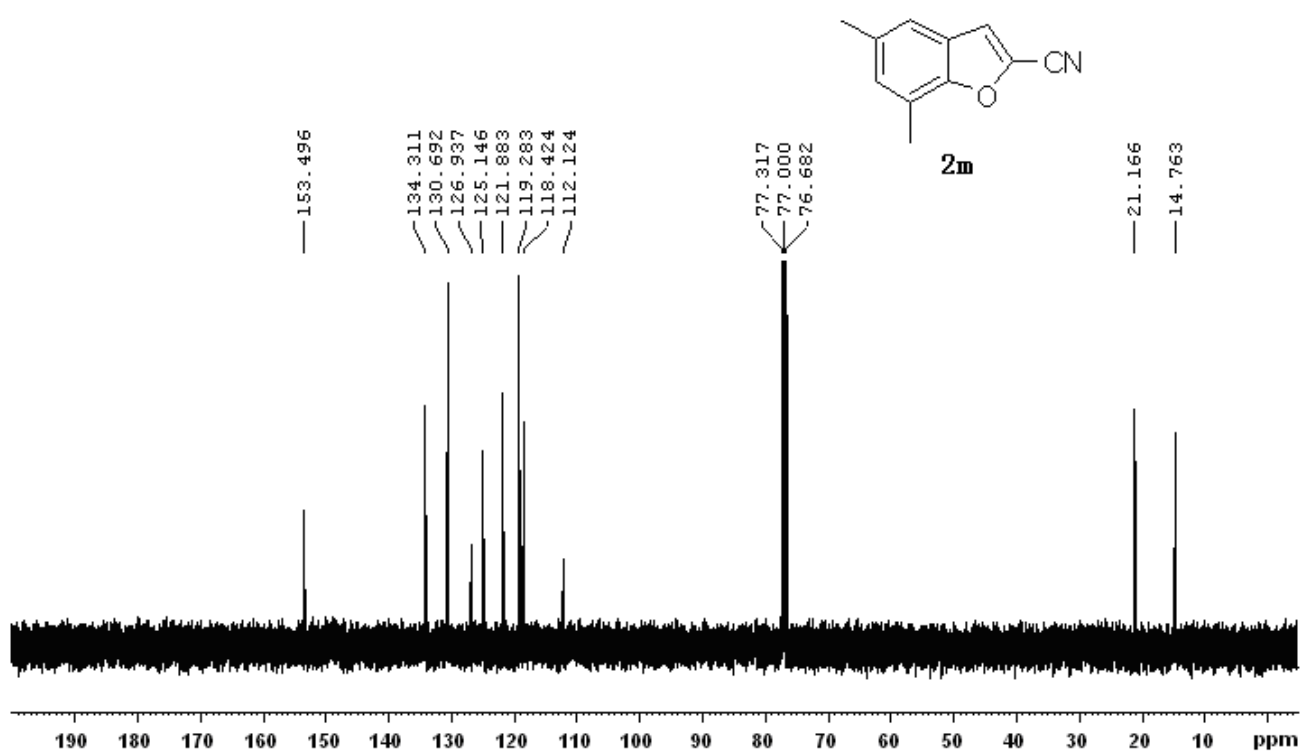



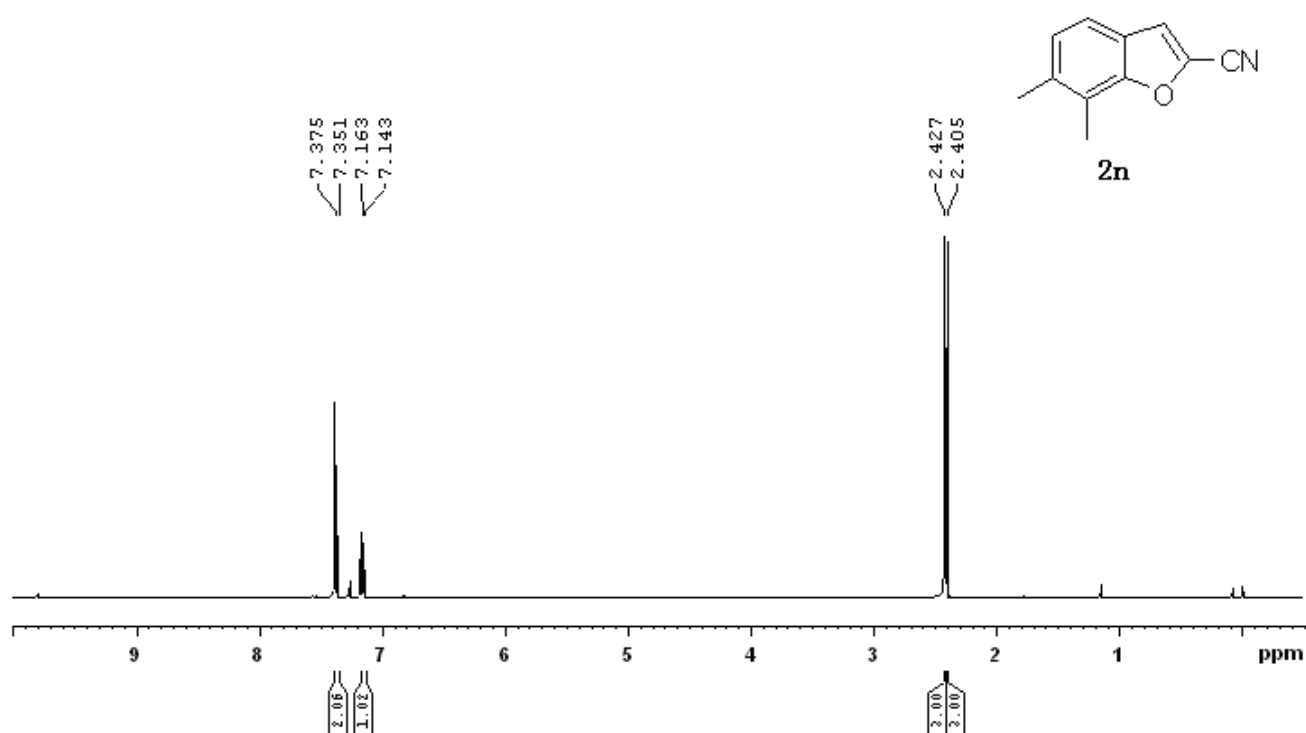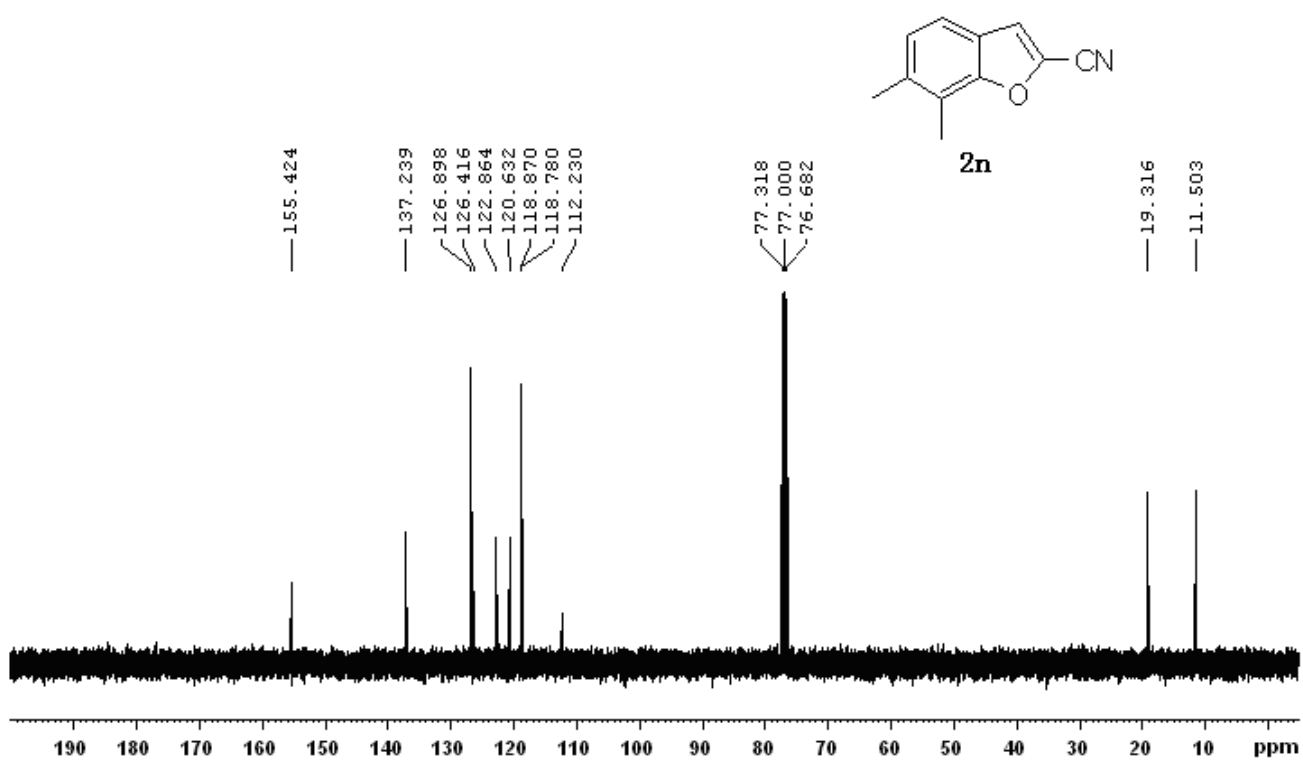

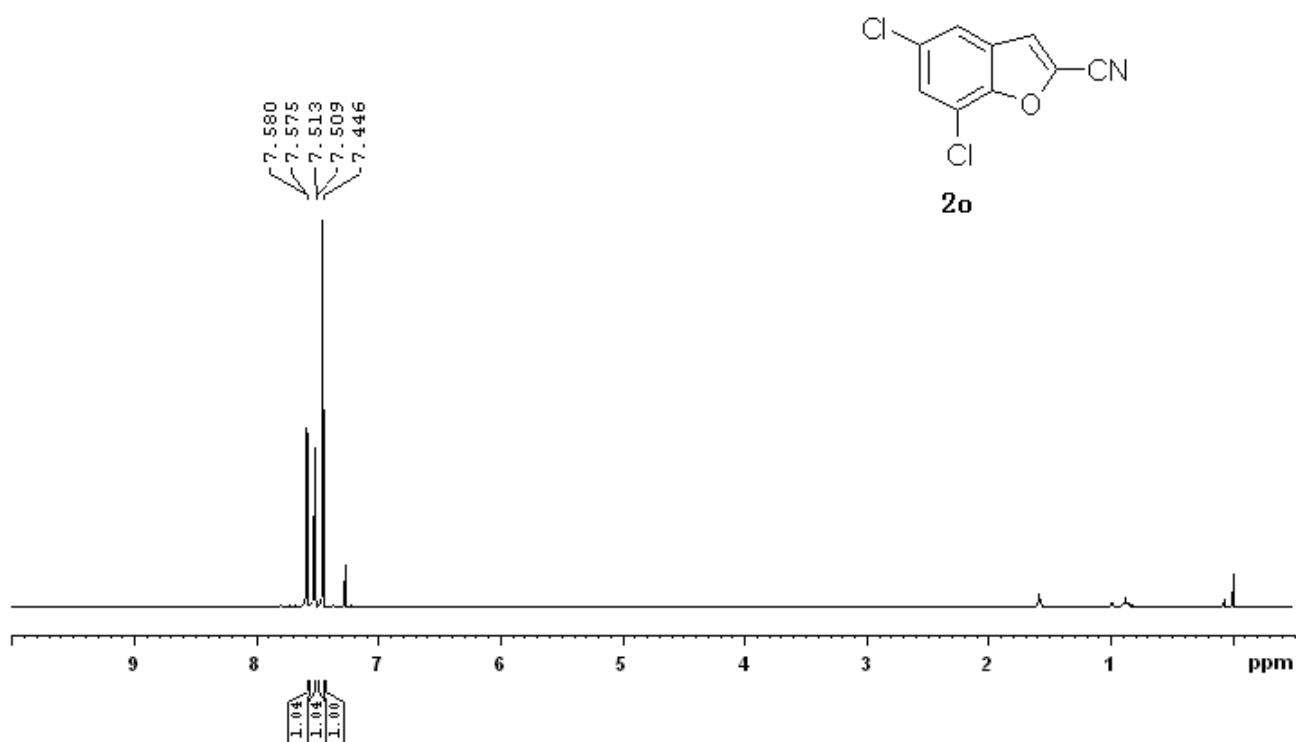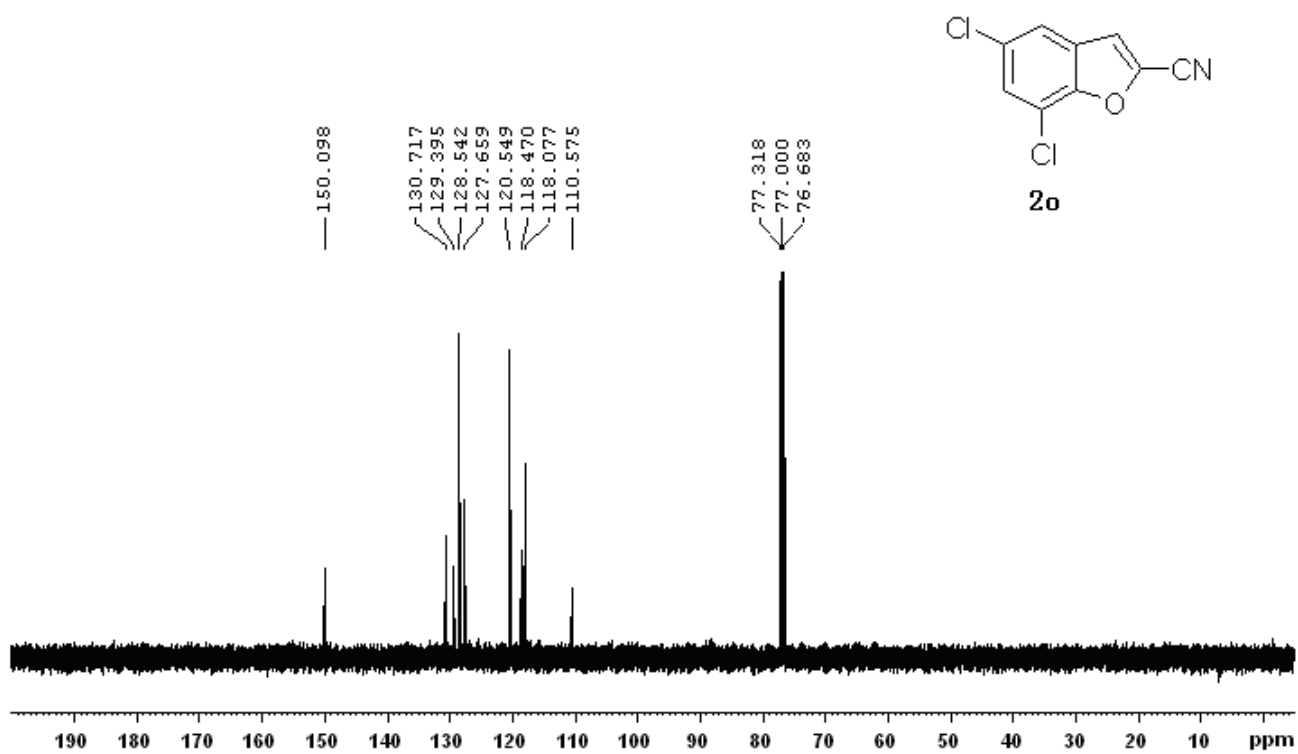

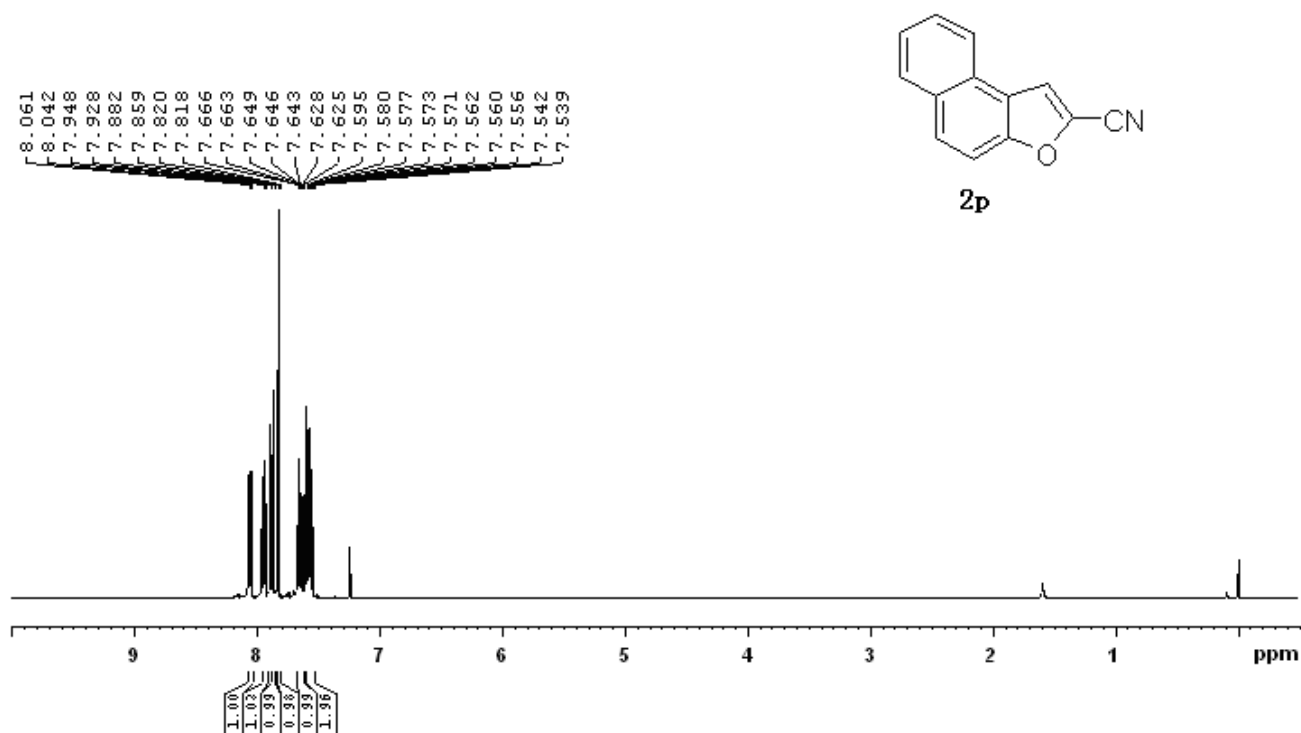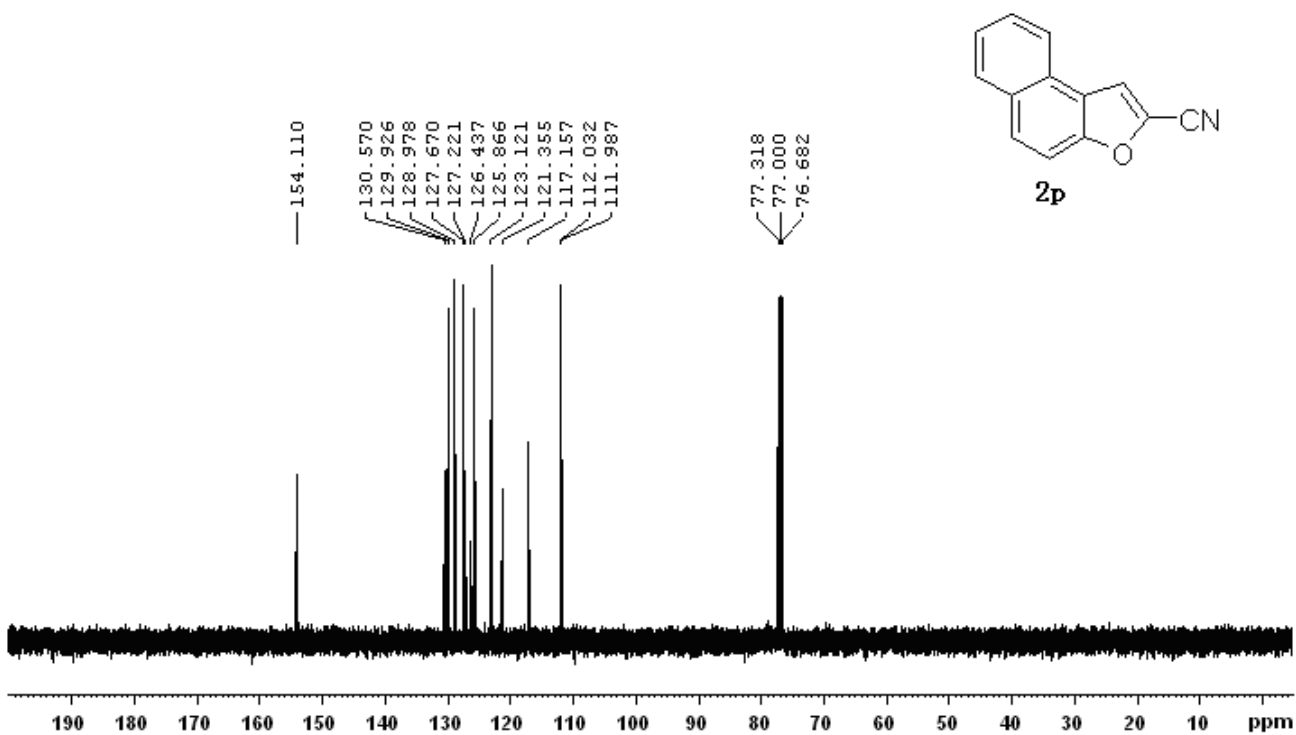

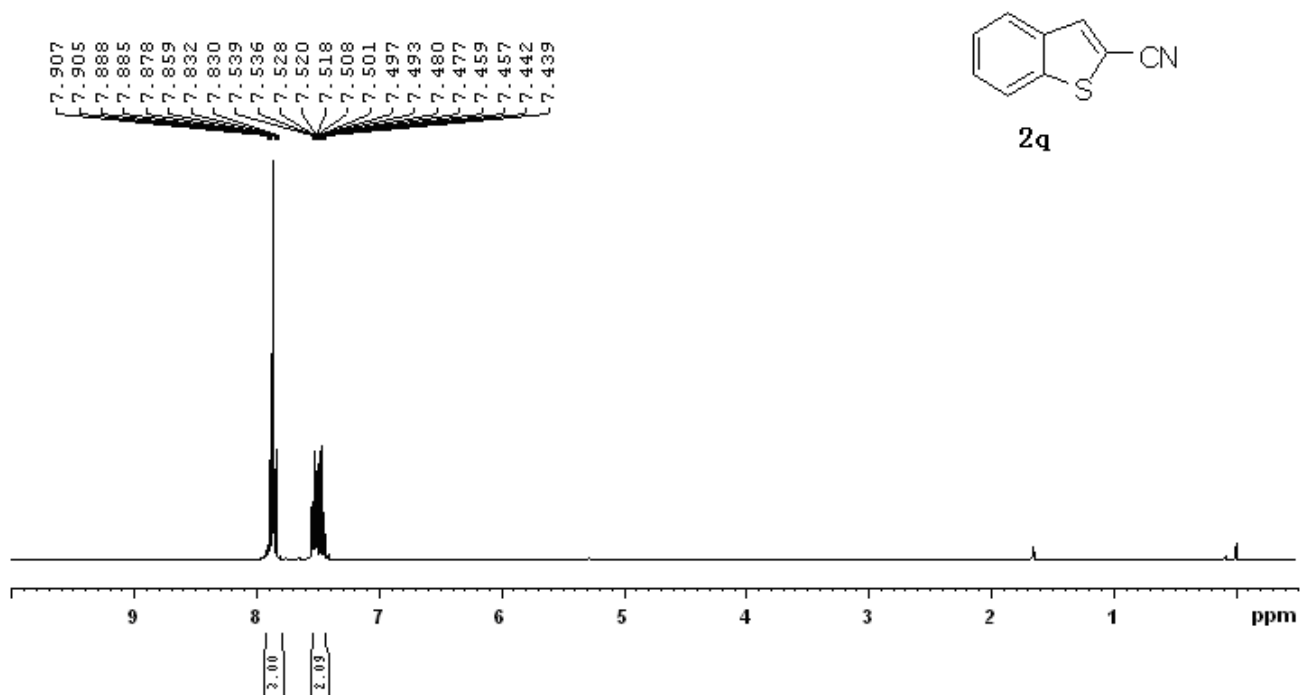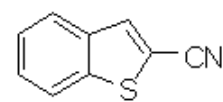

**2q**

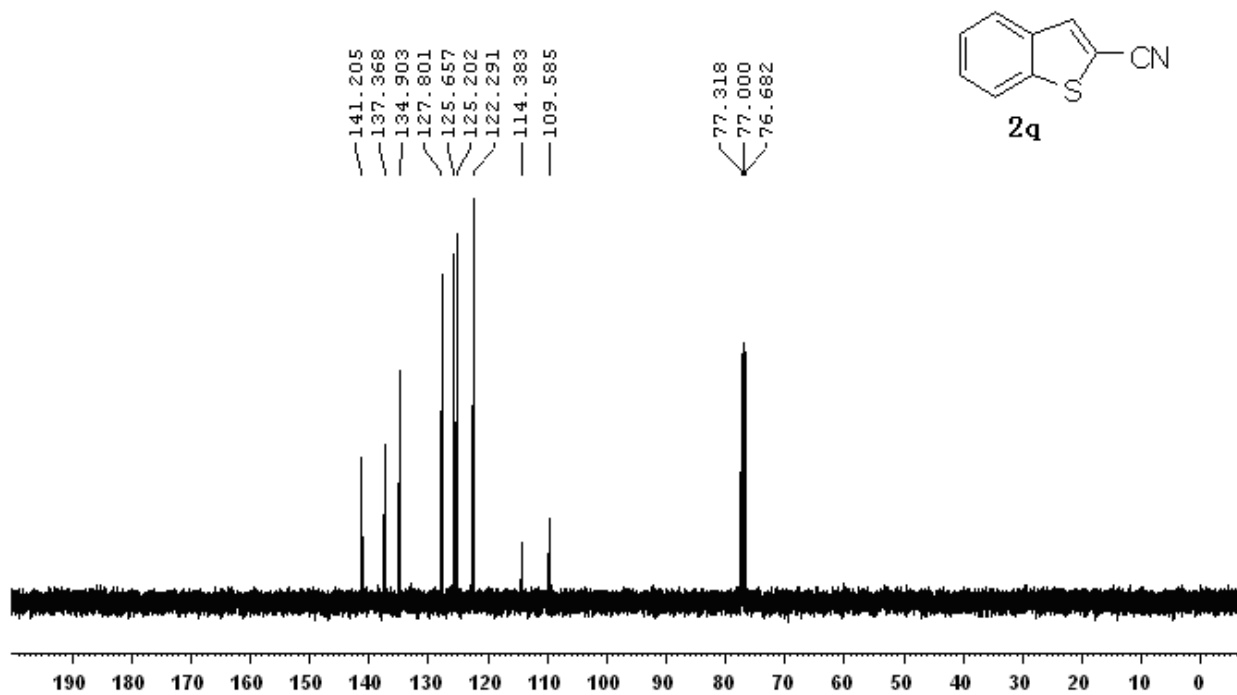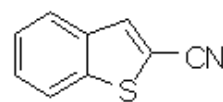

**2q**

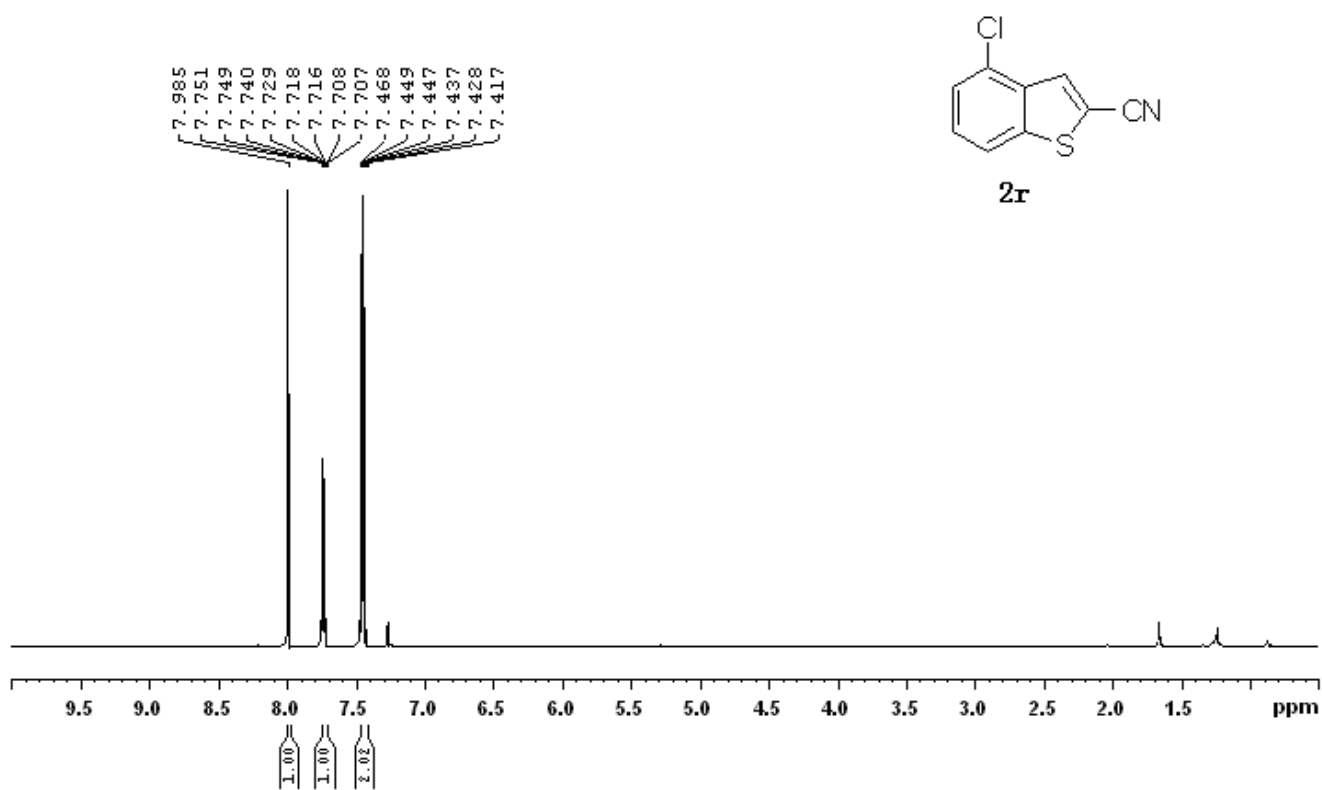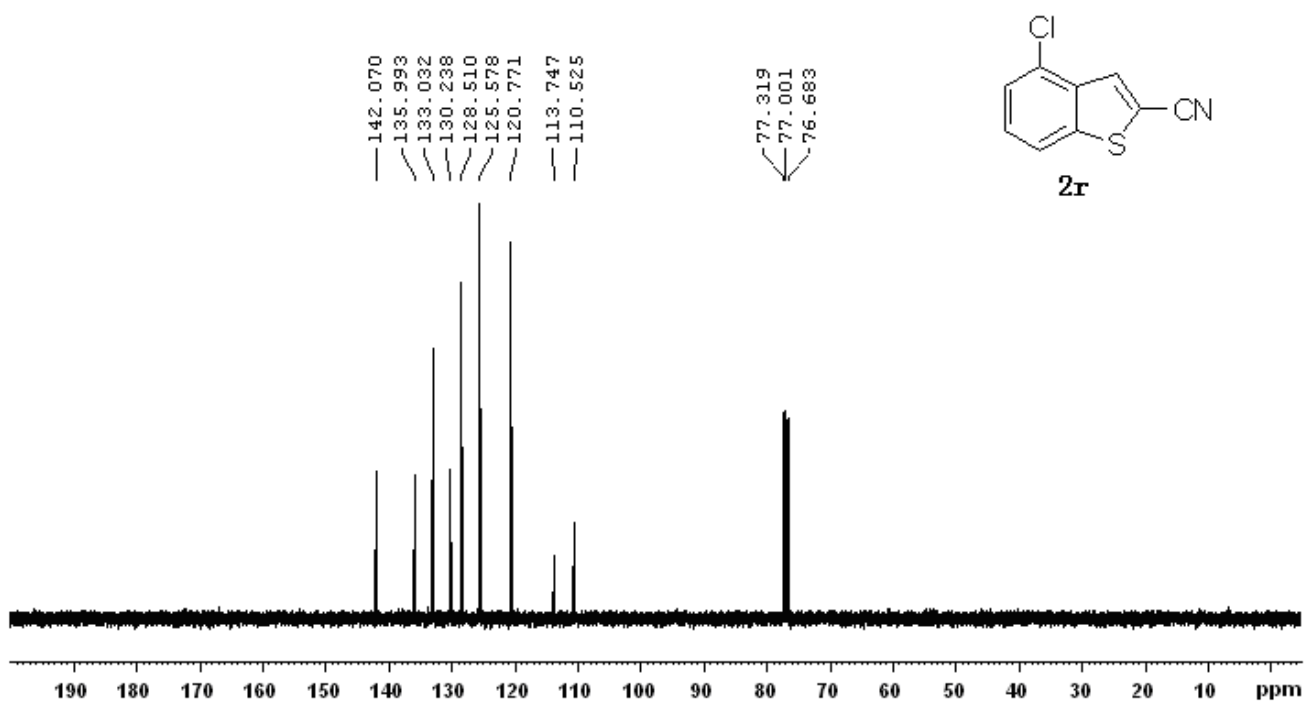

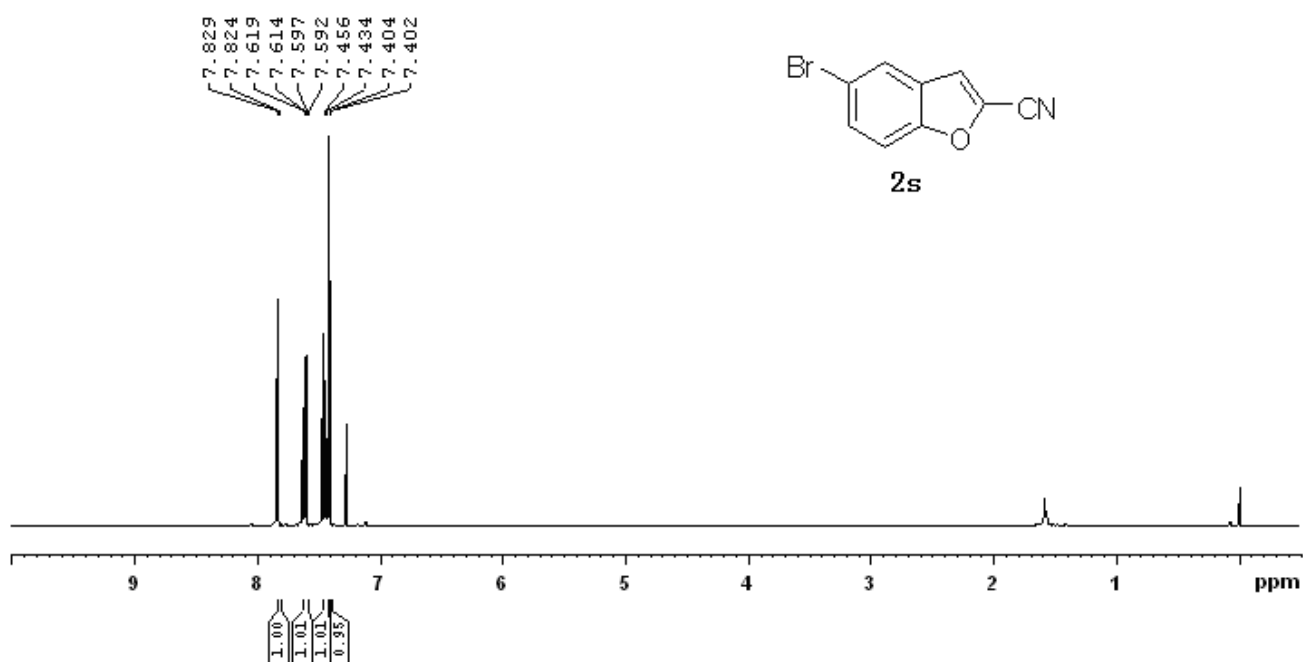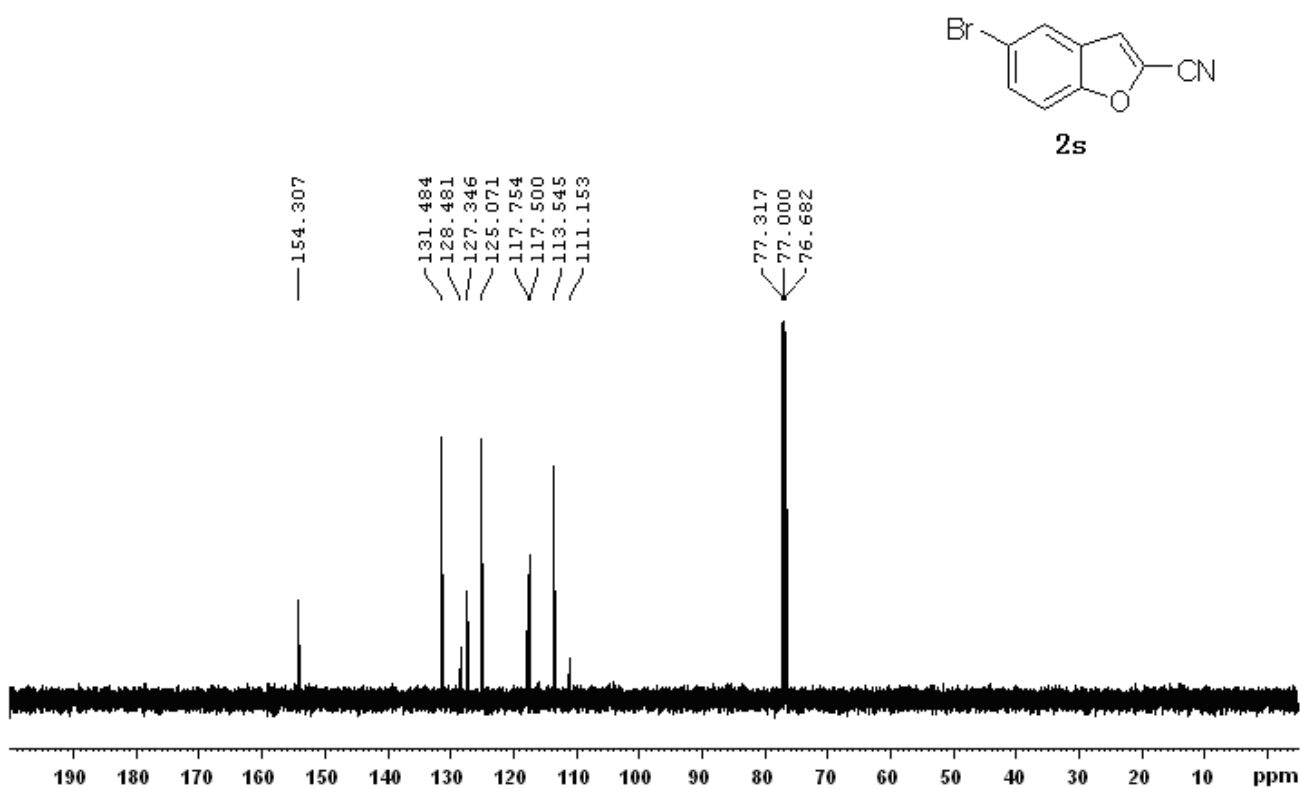

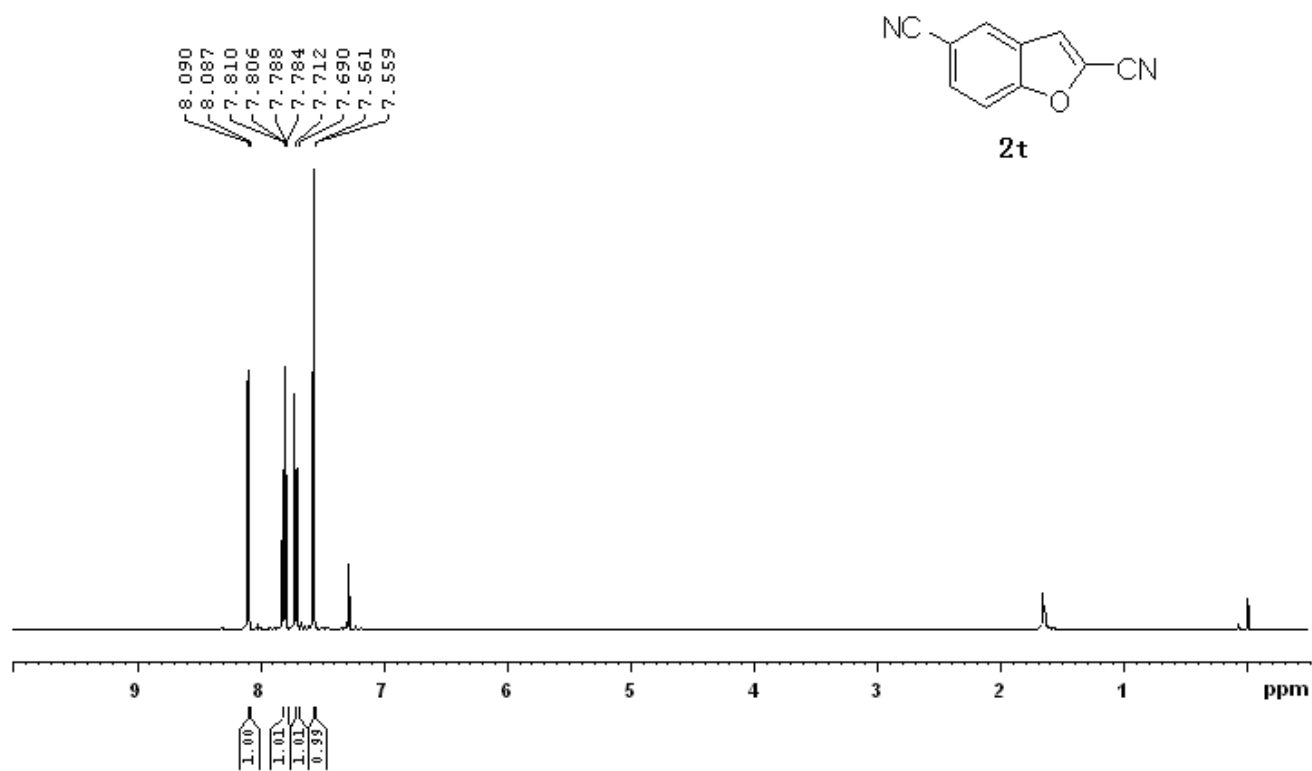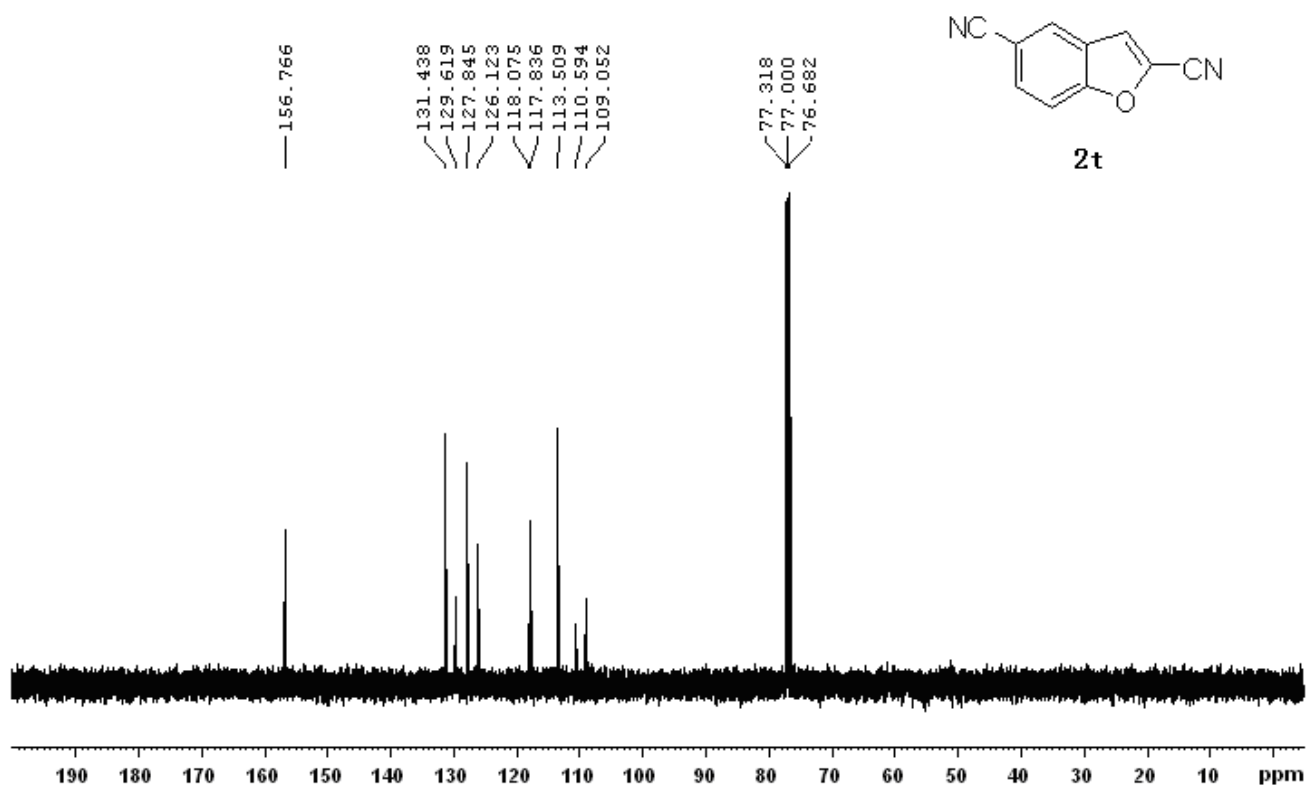

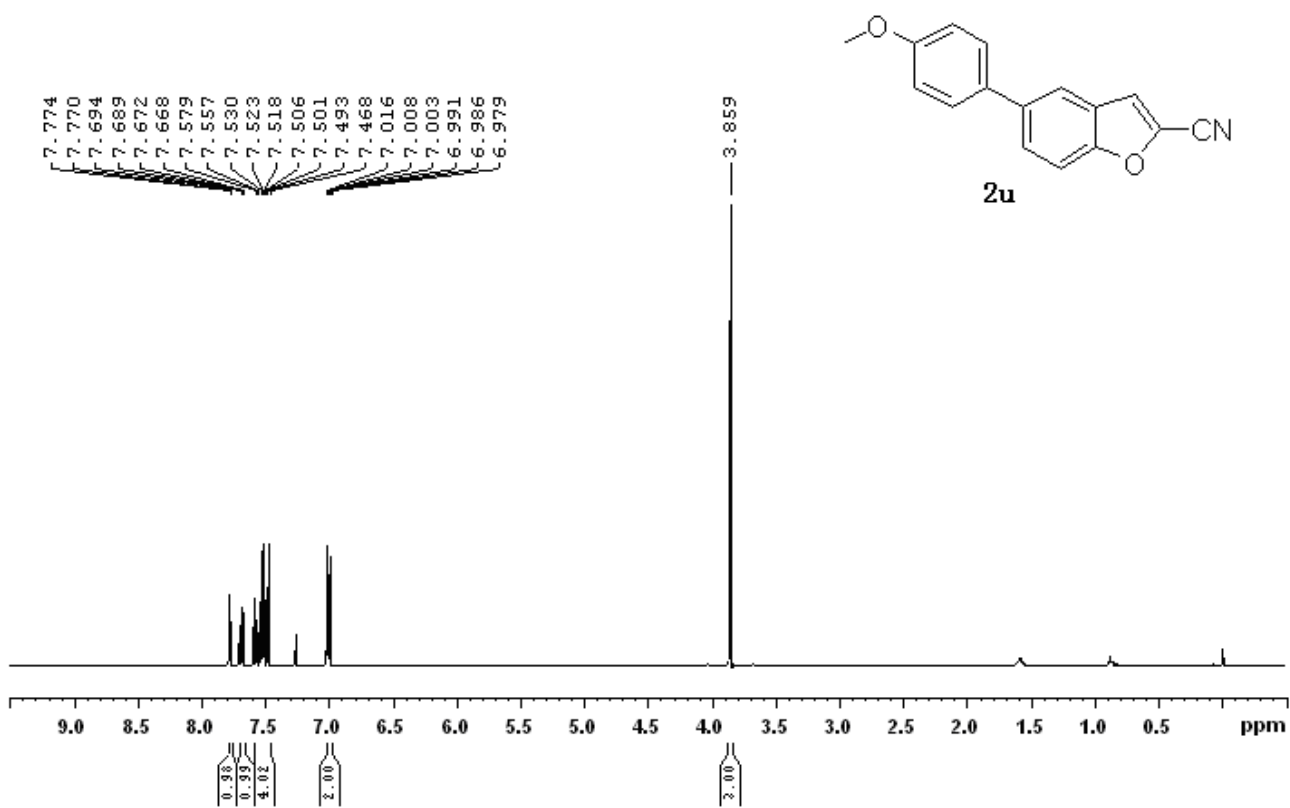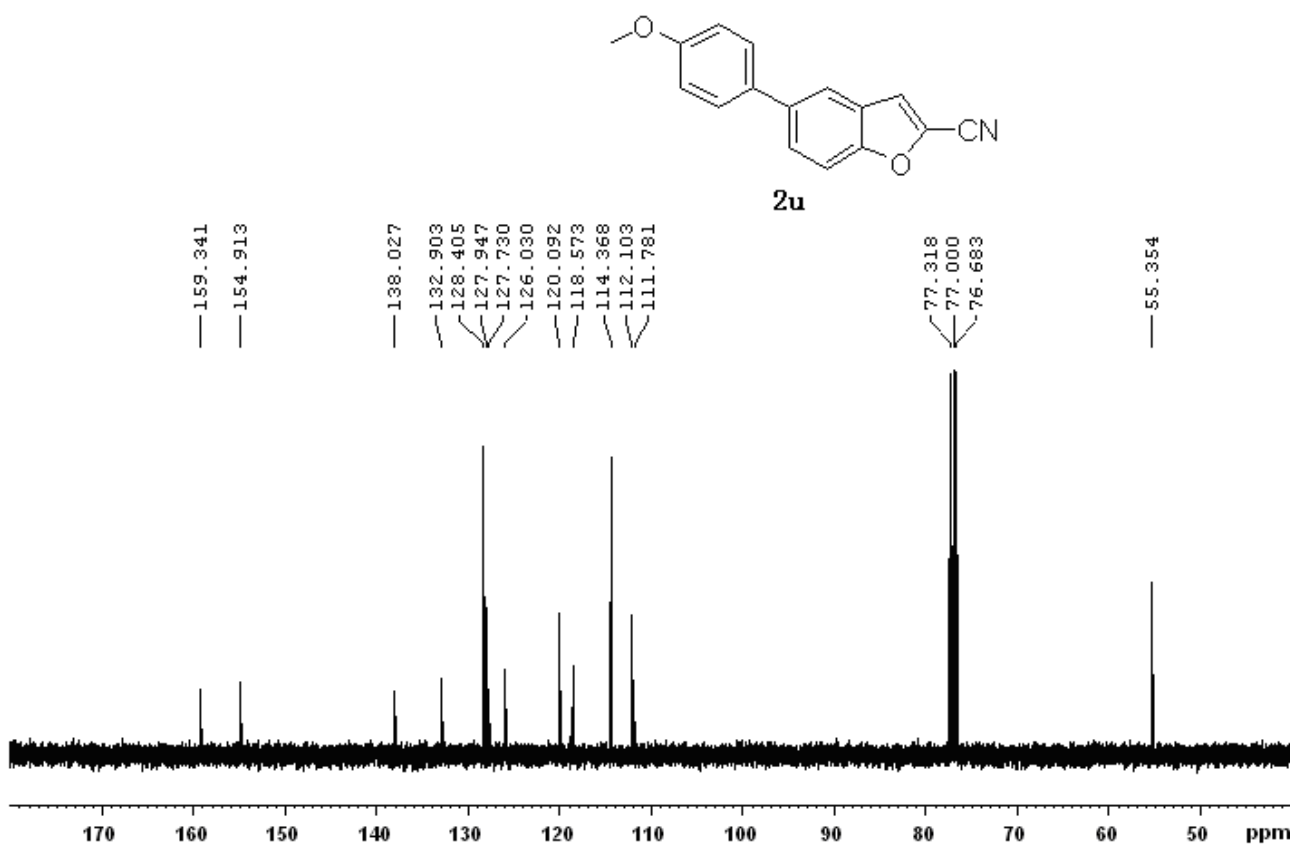



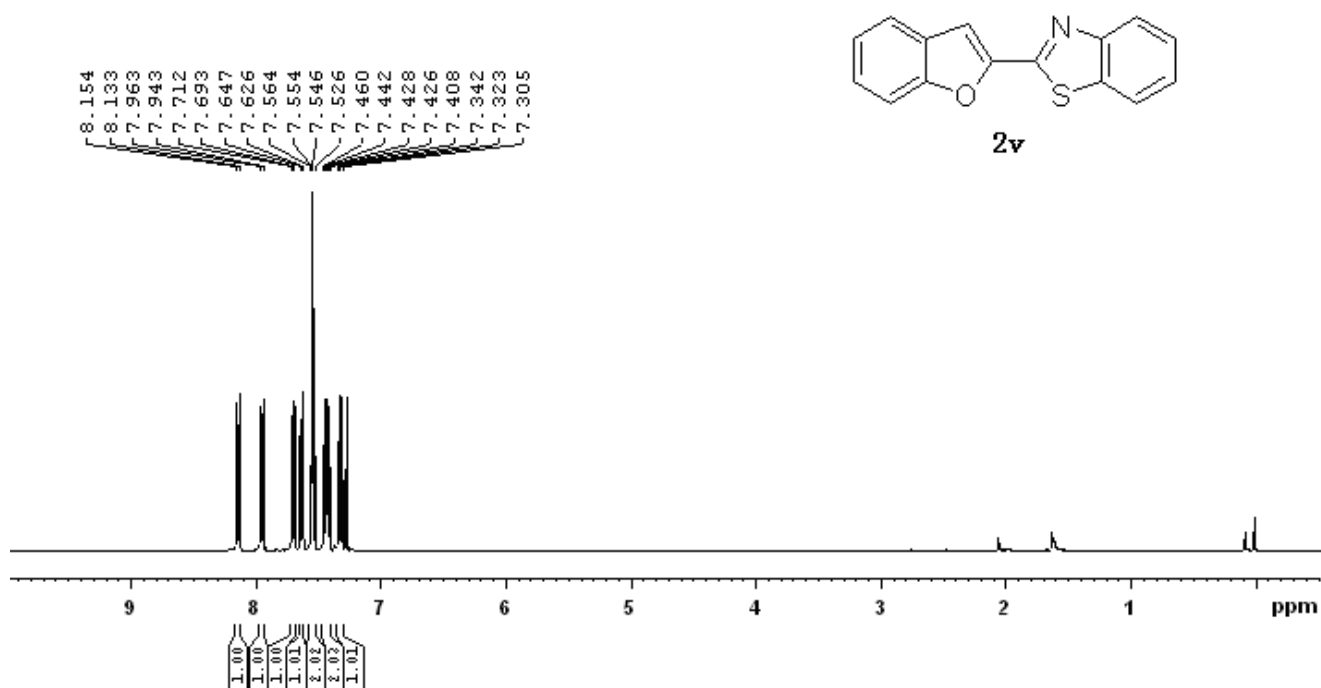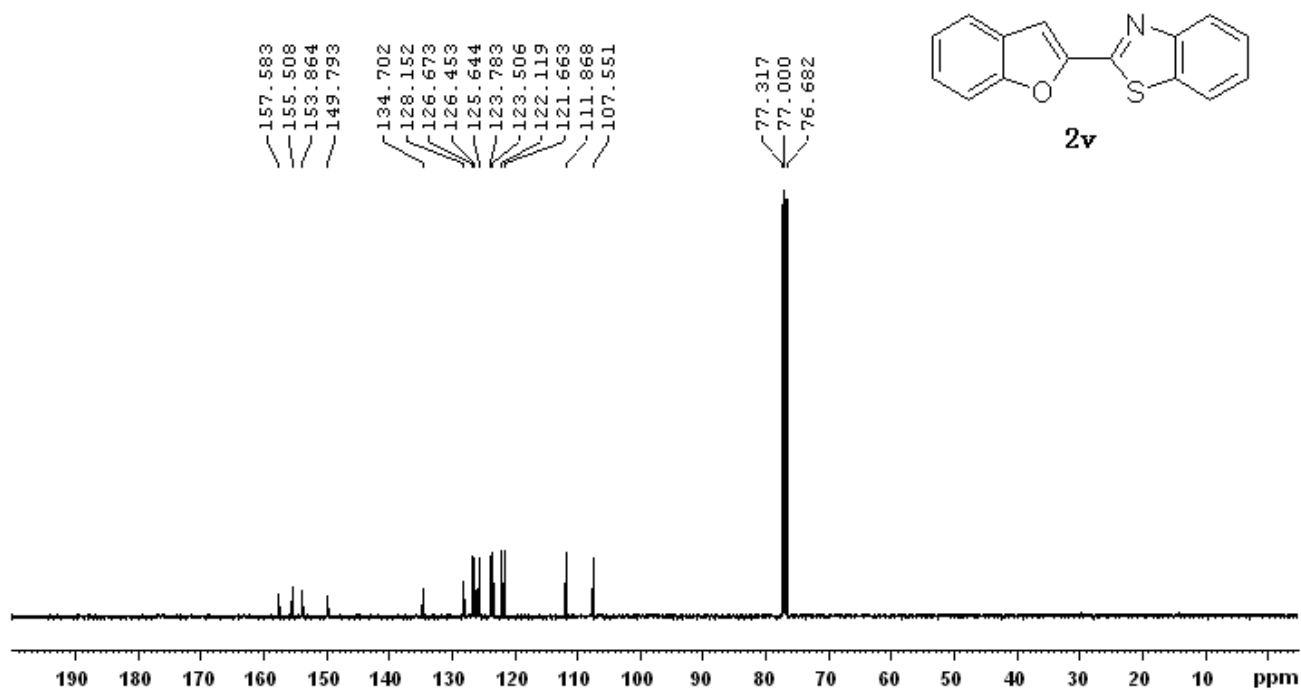

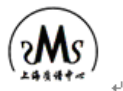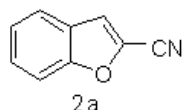

Shanghai Mass Spectrometry Center  
 Shanghai Institute of Organic Chemistry  
 Chinese Academic of Sciences  
 High Resolution MS Data Report

Instrument: Waters Micromass GCT Premier      Ionisation Mode: EI+      Electron Energy: 70eV

---

Card Serial Number: GCT-P-T11-05-0S0457<sup>+</sup>  
 Sample Serial Number: HBSF-J08-Sample8<sup>+</sup>  
 Operator: Li<sup>+</sup>  
 Date: 2011/06/03<sup>+</sup>  
 Elemental Composition Report<sup>+</sup>  
 Single Mass Analysis<sup>+</sup>  
 Tolerance = 5.0 PPM / DBE: min = -1.5, max = 50.0<sup>+</sup>  
 Element prediction: Off<sup>+</sup>  
 Monoisotopic Mass, Odd and Even Electron Ions<sup>+</sup>  
 217 formula(e) evaluated with 3 results within limits (all results (up to 1000) for each mass)<sup>+</sup>  
 Elements Used: C: 0-60    H: 0-80    N: 0-4    O: 0-6    S: 0-1    Cl: 0-1    Br: 0-2    I: 0-2    <sup>+</sup>  
 Minimum: -1.5<sup>+</sup>  
 Maximum: 50.0<sup>+</sup>

| Mass     | Calc. Mass | mDa  | PPM  | DBE  | i-FIT      | Formula <sup>+</sup>     |
|----------|------------|------|------|------|------------|--------------------------|
| 143.0372 | 143.0371   | 0.1  | 0.7  | 8.0  | 15.0...    | C9 H5 N O <sup>+</sup>   |
|          | 143.0376   | -0.4 | -2.8 | 3.5  | 22522.6... | C6 H8 N2 Cl <sup>+</sup> |
|          | 143.0378   | -0.6 | -4.2 | -1.5 | 5097.6...  | C3 H11 O4 S <sup>+</sup> |

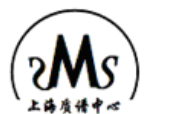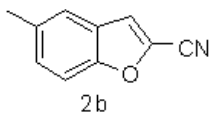

Shanghai Mass Spectrometry Center  
 Shanghai Institute of Organic Chemistry  
 Chinese Academic of Sciences  
 High Resolution MS Data Report

Instrument: Waters Micromass GCT Premier      Ionisation Mode: EI+      Electron Energy: 70eV

---

Card Serial Number: GCT-P-T11-07-0S0571<sup>+</sup>  
 Sample Serial Number: HBSF-LJ12-S04<sup>+</sup>  
 Operator: Li<sup>+</sup>  
 Date: 2011/07/22<sup>+</sup>  
 Elemental Composition Report<sup>+</sup>  
 Single Mass Analysis<sup>+</sup>  
 Tolerance = 1.5 mDa / DBE: min = -1.5, max = 50.0<sup>+</sup>  
 Element prediction: Off<sup>+</sup>  
 Monoisotopic Mass, Odd and Even Electron Ions<sup>+</sup>  
 161 formula(e) evaluated with 2 results within limits (all results (up to 1000) for each mass)<sup>+</sup>  
 Elements Used: C: 0-60    H: 0-80    N: 0-4    O: 0-6    Cl: 0-1    Br: 0-1    I: 0-2    <sup>+</sup>  
 Minimum: -1.5<sup>+</sup>  
 Maximum: 50.0<sup>+</sup>

| Mass     | Calc. Mass | mDa  | PPM  | DBE | i-FIT     | Formula <sup>+</sup>      |
|----------|------------|------|------|-----|-----------|---------------------------|
| 157.0530 | 157.0528   | 0.2  | 1.3  | 8.0 | 2.9...    | C10 H7 N O <sup>+</sup>   |
|          | 157.0533   | -0.3 | -1.9 | 3.5 | 3631.9... | C7 H10 N2 Cl <sup>+</sup> |

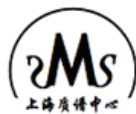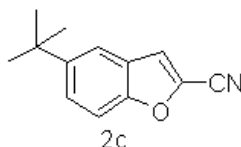

Shanghai Mass Spectrometry Center  
 Shanghai Institute of Organic Chemistry  
 Chinese Academic of Sciences  
 High Resolution MS Data Report

Instrument: Waters Micromass GCT Premier Ionisation Mode: EI+ Electron Energy: 70eV

Card Serial Number: GCT-P-T11-07-OS0560

Sample Serial Number: HBSF-WSH-J17-S16

Operator: Li

Date: 2011/07/15

Elemental Composition Report

Single Mass Analysis

Tolerance = 5.0 PPM / DBE: min = -1.5, max = 50.0

Element prediction: Off

Monoisotopic Mass, Odd and Even Electron Ions

289 formula(e) evaluated with 2 results within limits (all results (up to 1000) for each mass)

Elements Used: C: 0-60 H: 0-80 N: 0-4 O: 0-6 F: 0-1 Br: 0-1 I: 0-2

| Minimum: |            |      |      |      |           |               |
|----------|------------|------|------|------|-----------|---------------|
|          |            |      |      |      |           |               |
| Maximum: |            | 1.5  | 5.0  | 50.0 |           |               |
| Mass     | Calc. Mass | mDa  | PPM  | DBE  | i-FIT     | Formula       |
| 199.0995 | 199.0995   | 0.0  | 0.0  | 4.5  | 2783323.3 | C8 H12 N4 O F |
|          | 199.0997   | -0.2 | -1.0 | 8.0  | 2787109.8 | C13 H13 N O   |

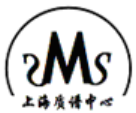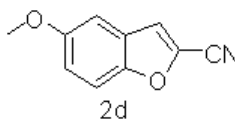

Shanghai Mass Spectrometry Center  
 Shanghai Institute of Organic Chemistry  
 Chinese Academic of Sciences  
 High Resolution MS Data Report

Instrument: Waters Micromass GCT Premier Ionisation Mode: EI+ Electron Energy: 70eV

Card Serial Number: GCT-P-T11-07-OS0572

Sample Serial Number: HBSF-LJ12-S05

Operator: Li

Date: 2011/07/25

Elemental Composition Report

Single Mass Analysis

Tolerance = 5.0 PPM / DBE: min = -1.5, max = 50.0

Element prediction: Off

Monoisotopic Mass, Odd and Even Electron Ions

200 formula(e) evaluated with 2 results within limits (all results (up to 1000) for each mass)

Elements Used: C: 0-60 H: 0-80 N: 0-4 O: 0-6 Cl: 0-1 Br: 0-1 I: 0-2

| Minimum: |            |      |      |      |        |                |
|----------|------------|------|------|------|--------|----------------|
|          |            |      |      |      |        |                |
| Maximum: |            | 1.5  | 5.0  | 50.0 |        |                |
| Mass     | Calc. Mass | mDa  | PPM  | DBE  | i-FIT  | Formula        |
| 173.0474 | 173.0477   | -0.3 | -1.7 | 8.0  | 9.6    | C10 H7 N O2    |
|          | 173.0482   | -0.8 | -4.6 | 3.5  | 9514.1 | C7 H10 N2 O Cl |

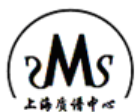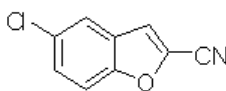

2e

Shanghai Mass Spectrometry Center  
 Shanghai Institute of Organic Chemistry  
 Chinese Academic of Sciences  
 High Resolution MS Data Report

Instrument: Waters Micromass GCT Premier Ionisation Mode: EI+ Electron Energy: 70eV  
 Card Serial Number: GCT-P-T11-05-OS0496  
 Sample Serial Number: HESF-J19-S18  
 Operator: Li  
 Date: 2011/06/21  
 Elemental Composition Report  
 Single Mass Analysis  
 Tolerance = 5.0 PPM / DBE: min = -1.5, max = 50.0  
 Element prediction: Off  
 Monoisotopic Mass, Odd and Even Electron Ions  
 202 formula(e) evaluated with 2 results within limits (all results (up to 1000) for each mass)  
 Elements Used: C: 0-60 H: 0-80 N: 0-4 O: 0-6 Cl: 0-1 Br: 0-1  
 Minimum: -1.5  
 Maximum: 1.5 5.0 50.0  

| Mass     | Calc. Mass | mDa  | PPM  | DBE  | i-FIT  | Formula      |
|----------|------------|------|------|------|--------|--------------|
| 176.9980 | 176.9981   | -0.1 | -0.6 | 8.0  | 8.1    | C9 H4 N O Cl |
|          | 176.9977   | 0.3  | 1.7  | 12.5 | 2080.6 | C12 H O2     |

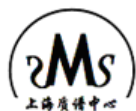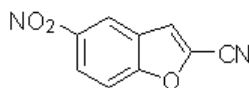

2f

Shanghai Mass Spectrometry Center  
 Shanghai Institute of Organic Chemistry  
 Chinese Academic of Sciences  
 High Resolution MS Data Report

Instrument: Waters Micromass GCT Premier Ionisation Mode: EI+ Electron Energy: 70eV  
 Card Serial Number: GCT-P-T11-05-OS0495  
 Sample Serial Number: HBSF-J19-S17  
 Operator: Li  
 Date: 2011/06/21  
 Elemental Composition Report  
 Single Mass Analysis  
 Tolerance = 5.0 PPM / DBE: min = -1.5, max = 50.0  
 Element prediction: Off  
 Monoisotopic Mass, Odd and Even Electron Ions  
 221 formula(e) evaluated with 2 results within limits (all results (up to 1000) for each mass)  
 Elements Used: C: 0-60 H: 0-80 N: 0-4 O: 0-6 Cl: 0-1 Br: 0-1  
 Minimum: -1.5  
 Maximum: 1.5 5.0 50.0  

| Mass     | Calc. Mass | mDa  | PPM  | DBE | i-FIT  | Formula        |
|----------|------------|------|------|-----|--------|----------------|
| 188.0223 | 188.0222   | 0.1  | 0.5  | 9.0 | 13.9   | C9 H4 N2 O3    |
|          | 188.0227   | -0.4 | -2.1 | 4.5 | 2354.9 | C6 H7 N3 O2 C1 |

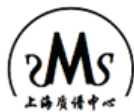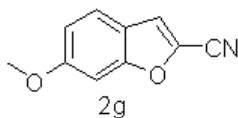

Shanghai Mass Spectrometry Center  
 Shanghai Institute of Organic Chemistry  
 Chinese Academic of Sciences  
 High Resolution MS Data Report

Instrument: Waters Micromass GCT Premier Ionisation Mode: EI+ Electron Energy: 70eV  
 Card Serial Number: GCT-P-T11-07-OS0559+  
 Sample Serial Number: HBSF-WSH-J17-S15+  
 Operator: Li+  
 Date: 2011/07/15+  
 Elemental Composition Report+  
 Single Mass Analysis +  
 Tolerance = 5.0 PPM / DBE: min = -1.5, max = 50.0+  
 Element prediction: Off +  
 Monoisotopic Mass, Odd and Even Electron Ions+  
 218 formula(e) evaluated with 2 results within limits (all results (up to 1000) for each mass)+  
 Elements Used:+  
 C: 0-60 H: 0-80 N: 0-4 O: 0-6 F: 0-1 Br: 0-1 I: 0-2 +  
 Minimum: -1.5+  
 Maximum: 1.5 5.0 50.0+  

| Mass     | Calc. Mass | mDa  | PPM  | DBE | i-FIT | Formula+        |
|----------|------------|------|------|-----|-------|-----------------|
| 173.0475 | 173.0475   | 0.0  | 0.0  | 4.5 | 59.8  | C5 H6 N4 O2 F + |
|          | 173.0477   | -0.2 | -1.2 | 8.0 | 0.2   | C10 H7 N O2 +   |

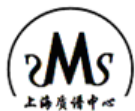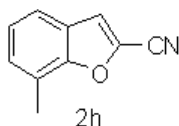

Shanghai Mass Spectrometry Center  
 Shanghai Institute of Organic Chemistry  
 Chinese Academic of Sciences  
 High Resolution MS Data Report

Instrument: Waters Micromass GCT Premier Ionisation Mode: EI+ Electron Energy: 70eV  
 Card Serial Number: GCT-P-T11-07-OS0570+  
 Sample Serial Number: HBSF-LJ12-S03+  
 Operator: Li+  
 Date: 2011/07/22+  
 Elemental Composition Report+  
 Single Mass Analysis +  
 Tolerance = 1.5 mDa / DBE: min = -1.5, max = 50.0+  
 Element prediction: Off +  
 Monoisotopic Mass, Odd and Even Electron Ions+  
 105 formula(e) evaluated with 2 results within limits (all results (up to 1000) for each mass)+  
 Elements Used:+  
 C: 0-60 H: 0-80 N: 0-4 O: 0-6 Br: 0-1 I: 0-2 +  
 Minimum: -1.5+  
 Maximum: 1.5 5.0 50.0+  

| Mass     | Calc. Mass | mDa  | PPM  | DBE | i-FIT | Formula+     |
|----------|------------|------|------|-----|-------|--------------|
| 157.0525 | 157.0526   | -0.3 | -1.9 | 8.0 | 5.4   | C10 H7 N O + |
|          | 157.0514   | 1.1  | 7.0  | 8.5 | 59.6  | C8 H5 N4 +   |

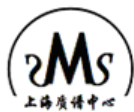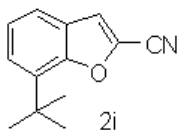

Shanghai Mass Spectrometry Center  
 Shanghai Institute of Organic Chemistry  
 Chinese Academic of Sciences  
 High Resolution MS Data Report

Instrument: Waters Micromass GCT Premier Ionisation Mode: EI+ Electron Energy: 70eV  
 Card Serial Number: GCT-P-T11-07-0S0560

Sample Serial Number: HBSF-WSH-J17-S16

Operator: Li

Date: 2011/07/15

Elemental Composition Report

Single Mass Analysis

Tolerance = 5.0 PPM / DBE: min = -1.5, max = 50.0

Element prediction: Off

Monoisotopic Mass, Odd and Even Electron Ions

289 formula(e) evaluated with 2 results within limits (all results (up to 1000) for each mass)

Elements Used: C: 0-60 H: 0-80 N: 0-4 O: 0-6 F: 0-1 Br: 0-1 I: 0-2

| Mass     | Calc. Mass | mDa  | PPM  | DBE | i-FIT     | Formula       |
|----------|------------|------|------|-----|-----------|---------------|
| 199.0995 | 199.0995   | 0.0  | 0.0  | 4.5 | 2783323.3 | C8 H12 N4 O F |
|          | 199.0997   | -0.2 | -1.0 | 8.0 | 2787109.8 | C13 H13 N O   |

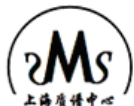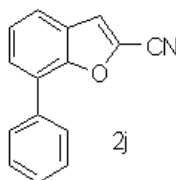

Shanghai Mass Spectrometry Center  
 Shanghai Institute of Organic Chemistry  
 Chinese Academic of Sciences  
 High Resolution MS Data Report

Instrument: Waters Micromass GCT Premier Ionisation Mode: EI+ Electron Energy: 70eV

Card Serial Number: GCT-P-T11-07-0S0575

Sample Serial Number: HBSF-LJ12-S08

Operator: Li

Date: 2011/07/25

Elemental Composition Report

Single Mass Analysis

Tolerance = 5.0 PPM / DBE: min = -1.5, max = 50.0

Element prediction: Off

Monoisotopic Mass, Odd and Even Electron Ions

328 formula(e) evaluated with 3 results within limits (all results (up to 1000) for each mass)

Elements Used: C: 0-60 H: 0-80 N: 0-4 O: 0-6 Cl: 0-1 Br: 0-1 I: 0-2

| Mass     | Calc. Mass | mDa  | PPM  | DBE  | i-FIT     | Formula       |
|----------|------------|------|------|------|-----------|---------------|
| 219.0681 | 219.0684   | -0.3 | -1.4 | 12.0 | 2724432.0 | C15 H9 N O    |
|          | 219.0689   | -0.8 | -3.7 | 7.5  | 2762153.3 | C12 H12 N2 Cl |
|          | 219.0671   | 1.0  | 4.6  | 12.5 | 2765412.5 | C13 H7 N4     |

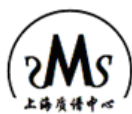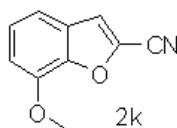

Shanghai Mass Spectrometry Center  
 Shanghai Institute of Organic Chemistry  
 Chinese Academic of Sciences  
 High Resolution MS Data Report

Instrument: Waters Micromass GCT Premier      Ionisation Mode: EI+      Electron Energy: 70eV

Card Serial Number: GCT-P-T11-05-0S0512<sup>+</sup>  
 Sample Serial Number: HBXF-HT7-S6<sup>+</sup>  
 Operator: Li<sup>+</sup>  
 Date: 2011/06/29<sup>+</sup>  
 Elemental Composition Report<sup>+</sup>  
 Single Mass Analysis <sup>+</sup>  
 Tolerance = 5.0 PPM / DBE: min = -1.5, max = 50.0<sup>+</sup>  
 Element prediction: Off <sup>+</sup>  
 Monoisotopic Mass, Odd and Even Electron Ions<sup>+</sup>  
 247 formula(e) evaluated with 4 results within limits (all results (up to 1000) for each mass)<sup>+</sup>  
 Elements Used:<sup>+</sup>  
 C: 0-60    H: 0-80    N: 0-4    O: 0-6    S: 0-1    Cl: 0-1 <sup>+</sup>  
 Minimum: -1.5<sup>+</sup>  
 Maximum: 50.0<sup>+</sup>

| Mass     | Calc. Mass | mDa  | PPM  | DBE  | i-FIT   | Formula <sup>+</sup>        |
|----------|------------|------|------|------|---------|-----------------------------|
| 173.0476 | 173.0477   | -0.1 | -0.6 | 8.0  | 6.0     | C10 H7 N O2 <sup>+</sup>    |
|          | 173.0470   | 0.6  | 3.5  | -1.0 | 2376.4  | C2 H11 N3 O4 S <sup>+</sup> |
|          | 173.0482   | -0.6 | -3.5 | 3.5  | 13455.6 | C7 H10 N2 O Cl <sup>+</sup> |
|          | 173.0484   | -0.8 | -4.6 | -1.5 | 2371.5  | C4 H13 O5 S <sup>+</sup>    |

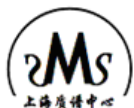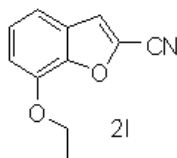

Shanghai Mass Spectrometry Center  
 Shanghai Institute of Organic Chemistry  
 Chinese Academic of Sciences  
 High Resolution MS Data Report

Instrument: Waters Micromass GCT Premier      Ionisation Mode: EI+      Electron Energy: 70eV

Card Serial Number: GCT-P-T11-05-0S0513<sup>+</sup>  
 Sample Serial Number: HBXF-HT7-S7<sup>+</sup>  
 Operator: Li Date: 2011/06/29<sup>+</sup>  
 Elemental Composition Report Single Mass Analysis <sup>+</sup>  
 Tolerance = 5.0 PPM / DBE: min = -1.5, max = 50.0<sup>+</sup>  
 Element prediction: Off <sup>+</sup>  
 Monoisotopic Mass, Odd and Even Electron Ions<sup>+</sup>  
 278 formula(e) evaluated with 4 results within limits (all results (up to 1000) for each mass)<sup>+</sup>  
 Elements Used: C: 0-60    H: 0-80    N: 0-4    O: 0-6    S: 0-1    Cl: 0-1 <sup>+</sup>  
 Minimum: -1.5<sup>+</sup>  
 Maximum: 50.0<sup>+</sup>

| Mass     | Calc. Mass | mDa  | PPM  | DBE  | i-FIT     | Formula <sup>+</sup>        |
|----------|------------|------|------|------|-----------|-----------------------------|
| 187.0636 | 187.0638   | -0.2 | -1.1 | 3.5  | 2775588.5 | C8 H12 N2 O Cl <sup>+</sup> |
|          | 187.0633   | 0.3  | 1.6  | 8.0  | 2773886.0 | C11 H9 N O2 <sup>+</sup>    |
|          | 187.0640   | -0.4 | -2.1 | -1.5 | 2775412.0 | C5 H15 O5 S <sup>+</sup>    |
|          | 187.0627   | 0.9  | 4.8  | -1.0 | 2775400.0 | C3 H13 N3 O4 S <sup>+</sup> |

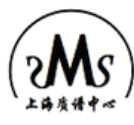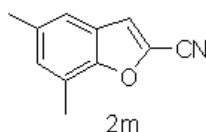

Shanghai Mass Spectrometry Center  
 Shanghai Institute of Organic Chemistry  
 Chinese Academic of Sciences  
 High Resolution MS Data Report

Instrument: Waters Micromass GCT Premier Ionisation Mode: EI+ Electron Energy: 70eV  
 Card Serial Number: GCT-P-T11-07-OS0574<sup>+</sup>  
 Sample Serial Number: HBSF-LJ12-S07<sup>+</sup>  
 Operator: Li<sup>+</sup>  
 Date: 2011/07/25<sup>+</sup>  
 Elemental Composition Report<sup>+</sup>  
 Single Mass Analysis <sup>+</sup>  
 Tolerance = 5.0 PPM / DBE: min = -1.5, max = 50.0<sup>+</sup>  
 Element prediction: Off <sup>+</sup>  
 Monoisotopic Mass, Odd and Even Electron Ions<sup>+</sup>  
 191 formula(e) evaluated with 2 results within limits (all results (up to 1000) for each mass)<sup>+</sup>  
 Elements Used:<sup>+</sup>

| C: 0-60  | H: 0-80    | N: 0-4 | O: 0-6 | Cl: 0-1 | Br: 0-1   | I: 0-2                    |                   |
|----------|------------|--------|--------|---------|-----------|---------------------------|-------------------|
| Minimum: |            |        |        |         |           |                           | -1.5 <sup>+</sup> |
| Maximum: |            |        | 1.5    | 5.0     |           |                           | 50.0 <sup>+</sup> |
| Mass     | Calc. Mass | mDa    | PPM    | DBE     | i-FIT     | Formula <sup>+</sup>      |                   |
| 171.0686 | 171.0684   | 0.2    | 1.2    | 8.0     | 2797603.8 | C11 H9 N O <sup>+</sup>   |                   |
|          | 171.0689   | -0.3   | -1.8   | 3.5     | 2803425.0 | C8 H12 N2 Cl <sup>+</sup> |                   |

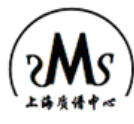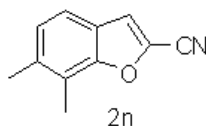

Shanghai Mass Spectrometry Center  
 Shanghai Institute of Organic Chemistry  
 Chinese Academic of Sciences  
 High Resolution MS Data Report

Instrument: Waters Micromass GCT Premier Ionisation Mode: EI+ Electron Energy: 70eV  
 Card Serial Number: GCT-P-T11-07-OS0573<sup>+</sup>  
 Sample Serial Number: HBSF-LJ12-S06<sup>+</sup>  
 Operator: Li<sup>+</sup>  
 Date: 2011/07/25<sup>+</sup>  
 Elemental Composition Report<sup>+</sup>  
 Single Mass Analysis <sup>+</sup>  
 Tolerance = 5.0 PPM / DBE: min = -1.5, max = 50.0<sup>+</sup>  
 Element prediction: Off <sup>+</sup>  
 Monoisotopic Mass, Odd and Even Electron Ions<sup>+</sup>  
 191 formula(e) evaluated with 1 results within limits (all results (up to 1000) for each mass)<sup>+</sup>  
 Elements Used:<sup>+</sup>

| C: 0-60  | H: 0-80    | N: 0-4 | O: 0-6 | Cl: 0-1 | Br: 0-1 | I: 0-2                  |                   |
|----------|------------|--------|--------|---------|---------|-------------------------|-------------------|
| Minimum: |            |        |        |         |         |                         | -1.5 <sup>+</sup> |
| Maximum: |            |        | 1.5    | 5.0     |         |                         | 50.0 <sup>+</sup> |
| Mass     | Calc. Mass | mDa    | PPM    | DBE     | i-FIT   | Formula <sup>+</sup>    |                   |
| 171.0680 | 171.0684   | -0.4   | -2.3   | 8.0     | 110.5   | C11 H9 N O <sup>+</sup> |                   |



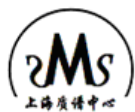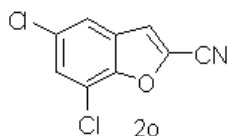

Shanghai Mass Spectrometry Center  
 Shanghai Institute of Organic Chemistry  
 Chinese Academic of Sciences  
 High Resolution MS Data Report

Instrument: Waters Micromass GCT Premier Ionisation Mode: EI+ Electron Energy: 70eV  
 Card Serial Number: GCT-P-T11-05-OS0497  
 Sample Serial Number: HBSF-J19-S19  
 Operator: Li  
 Date: 2011/06/21  
 Elemental Composition Report  
 Single Mass Analysis  
 Tolerance = 5.0 PPM / DBE: min = -1.5, max = 50.0  
 Element prediction: Off  
 Monoisotopic Mass, Odd and Even Electron Ions  
 352 formula(e) evaluated with 3 results within limits (all results (up to 1000) for each mass)  
 Elements Used: C: 0-60 H: 0-80 N: 0-4 O: 0-6 Cl: 0-2 Br: 0-1  
 Minimum: -1.5  
 Maximum: 1.5 5.0 50.0  

| Mass     | Calc. Mass | mDa | PPM | DBE  | i-FIT | Formula        |
|----------|------------|-----|-----|------|-------|----------------|
| 210.9595 | 210.9593   | 0.2 | 0.9 | 2.0  | 329.7 | C3 H6 N3 O3 Br |
|          | 210.9592   | 0.3 | 1.4 | 8.0  | 2.7   | C9 H3 N O C12  |
|          | 210.9587   | 0.8 | 3.8 | 12.5 | 324.5 | C12 O2 C1      |

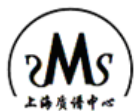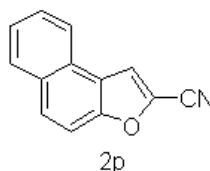

Shanghai Mass Spectrometry Center  
 Shanghai Institute of Organic Chemistry  
 Chinese Academic of Sciences  
 High Resolution MS Data Report

Instrument: Waters Micromass GCT Premier Ionisation Mode: EI+ Electron Energy: 70eV  
 Card Serial Number: GCT-P-T11-07-OS0558  
 Sample Serial Number: HBSF-WSH-J17-S14  
 Operator: Li  
 Date: 2011/07/15  
 Elemental Composition Report  
 Single Mass Analysis  
 Tolerance = 5.0 PPM / DBE: min = -1.5, max = 50.0  
 Element prediction: Off  
 Monoisotopic Mass, Odd and Even Electron Ions  
 280 formula(e) evaluated with 2 results within limits (all results (up to 1000) for each mass)  
 Elements Used: C: 0-60 H: 0-80 N: 0-4 O: 0-6 F: 0-1 Br: 0-1 I: 0-2  
 Minimum: -1.5  
 Maximum: 1.5 5.0 50.0  

| Mass     | Calc. Mass | mDa | PPM | DBE  | i-FIT     | Formula      |
|----------|------------|-----|-----|------|-----------|--------------|
| 193.0529 | 193.0528   | 0.1 | 0.5 | 11.0 | 2783012.8 | C13 H7 N O   |
|          | 193.0526   | 0.3 | 1.6 | 7.5  | 2779812.5 | C8 H6 N4 O F |

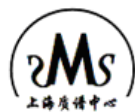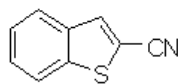

2q

Shanghai Mass Spectrometry Center  
 Shanghai Institute of Organic Chemistry  
 Chinese Academic of Sciences  
 High Resolution MS Data Report

Instrument: Waters Micromass GCT Premier Ionisation Mode: EI+ Electron Energy: 70eV  
 Card Serial Number: GCT-P-T11-08-OS0639  
 Sample Serial Number: HBSF-A8-S3  
 Operator: Li  
 Date: 2011/08/22  
 Elemental Composition Report  
 Single Mass Analysis  
 Tolerance = 5.0 PPM / DBE: min = -1.5, max = 50.0  
 Element prediction: Off  
 Monoisotopic Mass, Odd and Even Electron Ions  
 187 formula(e) evaluated with 2 results within limits (all results (up to 1000) for each mass)  
 Elements Used:  
 C: 0-60 H: 0-80 N: 0-6 O: 0-4 S: 0-1 Br: 0-1  
 Minimum: -1.5  
 Maximum: 1.5 5.0 50.0  

| Mass     | Calc. Mass | mDa  | PPM  | DBE | i-FIT | Formula     |
|----------|------------|------|------|-----|-------|-------------|
| 159.0147 | 159.0143   | 0.4  | 2.5  | 8.0 | 1.8   | C9 H5 N S   |
|          | 159.0154   | -0.7 | -4.4 | 4.5 | 551.6 | C3 H3 N4 O4 |

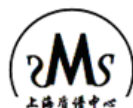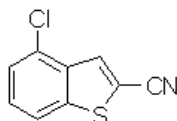

2r

Shanghai Mass Spectrometry Center  
 Shanghai Institute of Organic Chemistry  
 Chinese Academic of Sciences  
 High Resolution MS Data Report

Instrument: Waters Micromass GCT Premier Ionisation Mode: EI+ Electron Energy: 70eV  
 Card Serial Number: GCT-P-T11-08-OS0640  
 Sample Serial Number: HBSF-A8-S4  
 Operator: Li  
 Date: 2011/08/22  
 Elemental Composition Report  
 Single Mass Analysis  
 Tolerance = 5.0 PPM / DBE: min = -1.5, max = 50.0  
 Element prediction: Off  
 Monoisotopic Mass, Odd and Even Electron Ions  
 427 formula(e) evaluated with 3 results within limits (all results (up to 1000) for each mass)  
 Elements Used:  
 C: 0-60 H: 0-80 N: 0-6 O: 0-4 S: 0-1 Cl: 0-1 Br: 0-1  
 Minimum: -1.5  
 Maximum: 1.5 5.0 50.0  

| Mass     | Calc. Mass | mDa  | PPM  | DBE  | i-FIT  | Formula        |
|----------|------------|------|------|------|--------|----------------|
| 192.9756 | 192.9753   | 0.3  | 1.6  | 8.0  | 5.4    | C9 H4 N S Cl   |
|          | 192.9748   | 0.8  | 4.1  | 12.5 | 2712.3 | C12 H O S      |
|          | 192.9765   | -0.9 | -4.7 | 4.5  | 292.5  | C3 H2 N4 O4 Cl |

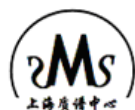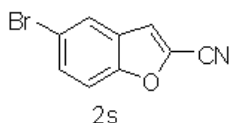

Shanghai Mass Spectrometry Center  
 Shanghai Institute of Organic Chemistry  
 Chinese Academic of Sciences  
 High Resolution MS Data Report

Instrument: Waters Micromass GCT Premier Ionisation Mode: EI+ Electron Energy: 70eV

Card Serial Number: GCT-P-T11-08-OS0637

Sample Serial Number: HBSF-A8-S1

Operator: Li

Date: 2011/08/22

Elemental Composition Report

Single Mass Analysis

Tolerance = 5.0 PPM / DBE: min = -1.5, max = 50.0

Element prediction: Off

Monoisotopic Mass, Odd and Even Electron Ions

311 formula(e) evaluated with 3 results within limits (all results (up to 1000) for each mass)

Elements Used: C: 0-60 H: 0-80 N: 0-6 O: 0-4 S: 0-1 Br: 0-1

| Minimum: |            |      |      |      |       |                 |
|----------|------------|------|------|------|-------|-----------------|
| Maximum: |            | 1.5  | 5.0  | 50.0 |       |                 |
| Mass     | Calc. Mass | mDa  | PPM  | DBE  | i-FIT | Formula         |
| 220.9474 | 220.9476   | -0.2 | -0.9 | 8.0  | 3.0   | C9 H4 N O Br    |
|          | 220.9470   | 0.4  | 1.8  | -1.0 | 26.0  | C H8 N3 O3 S Br |
|          | 220.9483   | -0.9 | -4.1 | -1.5 | 20.7  | C3 H10 O4 S Br  |

↵  
↵

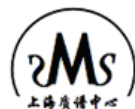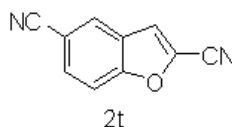

Shanghai Mass Spectrometry Center  
 Shanghai Institute of Organic Chemistry  
 Chinese Academic of Sciences  
 High Resolution MS Data Report

Instrument: Waters Micromass GCT Premier Ionisation Mode: EI+ Electron Energy: 70eV

Card Serial Number: GCT-P-T11-08-OS0638

Sample Serial Number: HBSF-A8-S2

Operator: Li

Date: 2011/08/22

Elemental Composition Report

Single Mass Analysis

Tolerance = 5.0 PPM / DBE: min = -1.5, max = 50.0

Element prediction: Off

Monoisotopic Mass, Odd and Even Electron Ions

187 formula(e) evaluated with 2 results within limits (all results (up to 1000) for each mass)

Elements Used: C: 0-60 H: 0-80 N: 0-6 O: 0-4 S: 0-1 Br: 0-1

| Minimum: |            |      |      |      |           |               |
|----------|------------|------|------|------|-----------|---------------|
| Maximum: |            | 1.5  | 5.0  | 50.0 |           |               |
| Mass     | Calc. Mass | mDa  | PPM  | DBE  | i-FIT     | Formula       |
| 168.0320 | 168.0317   | 0.3  | 1.8  | 1.0  | 2774561.8 | C2 H8 N4 O3 S |
|          | 168.0324   | -0.4 | -2.4 | 10.0 | 2773286.8 | C10 H4 N2 O   |

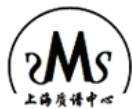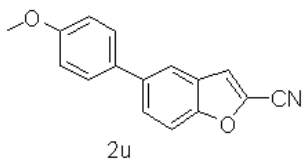

Shanghai Mass Spectrometry Center  
Shanghai Institute of Organic Chemistry  
Chinese Academic of Sciences  
High Resolution MS Data Report

Instrument: Waters Micromass GCT Premier Ionisation Mode: EI+ Electron Energy: 70eV

Card Serial Number: GCT-P-T11-10-050796

Sample Serial Number: HBSF-Li012-S11

Operator: Li

Date: 2011/10/18

Elemental Composition Report

Single Mass Analysis

Tolerance = 5.0 PPM / DBE: min = -1.5, max = 50.0

Element prediction: Off

Monoisotopic Mass, Odd and Even Electron Ions

330 formula(e) evaluated with 3 results within limits (all results (up to 1000) for each mass)

Elements Used: C: 0-60 H: 0-80 N: 0-2 O: 0-6 S: 0-1 Cl: 0-2

Minimum:

Maximum: 2.0 5.0 50.0

| Mass     | Calc. Mass | mDa  | PPM  | DBE  | i-FIT  | Formula         |
|----------|------------|------|------|------|--------|-----------------|
| 249.0788 | 249.0790   | -0.2 | -0.8 | 12.0 | 1.4    | C16 H11 N O2    |
|          | 249.0795   | -0.7 | -2.8 | 7.5  | 4645.6 | C13 H14 N2 O Cl |
|          | 249.0797   | -0.9 | -3.6 | 2.5  | 525.7  | C10 H17 O5 S    |
